# Supplementary material for: Community pharmacists’ services for women during pregnancy and breast feeding in Kuwait: a cross-sectional study
Source: PubMed Central journal article supplement — BMJ Open. 2018 Jan 5;8(1):e018980. doi: 10.1136/bmjopen-2017-018980 (PMC5780848; doi:10.1136/bmjopen-2017-018980), 2018-01-05
Supplement: bmjopen-2017-018980.draft_revisions.pdf [file bmjopen-2017-018980.draft_revisions.pdf]

# BMJ Open

BMJ Open is committed to open peer review. As part of this commitment we make the peer review history of every article we publish publicly available.

When an article is published we post the peer reviewers' comments and the authors' responses online. We also post the versions of the paper that were used during peer review. These are the versions that the peer review comments apply to.

The versions of the paper that follow are the versions that were submitted during the peer review process. They are not the versions of record or the final published versions. They should not be cited or distributed as the published version of this manuscript.

BMJ Open is an open access journal and the full, final, typeset and author-corrected version of record of the manuscript is available on our site with no access controls, subscription charges or pay-per-view fees (<http://bmjopen.bmj.com>).

If you have any questions on BMJ Open's open peer review process please email [editorial.bmjopen@bmj.com](mailto:editorial.bmjopen@bmj.com)

# BMJ Open

## Community pharmacists' services for women during pregnancy and breastfeeding in Kuwait: A cross-sectional study

|                                 |                                                                                                                                                                  |
|---------------------------------|------------------------------------------------------------------------------------------------------------------------------------------------------------------|
| Journal:                        | <i>BMJ Open</i>                                                                                                                                                  |
| Manuscript ID                   | bmjopen-2017-018980                                                                                                                                              |
| Article Type:                   | Research                                                                                                                                                         |
| Date Submitted by the Author:   | 03-Aug-2017                                                                                                                                                      |
| Complete List of Authors:       | Albassam, Abdullah ; Kuwait University - Faculty of Pharmacy, Pharmacy Practice<br>Awad, Abdelmoneim; Kuwait University - Faculty of Pharmacy, Pharmacy Practice |
| <b>Primary Subject Heading</b>: | Public health                                                                                                                                                    |
| Secondary Subject Heading:      | Health services research                                                                                                                                         |
| Keywords:                       | Community pharmacists, pregnancy, breastfeeding, self-care, self-medication, Kuwait                                                                              |
|                                 |                                                                                                                                                                  |

SCHOLARONE™  
Manuscripts

1 **Title: Community pharmacists' services for women during pregnancy and breastfeeding in**  
2 **Kuwait: A cross-sectional study**

3  
4 **Authors Information:**

5  
6  
7 **1. Abdullah Albassam, PhD**

8  
9 Assistant Professor  
10 Department of Pharmacy Practice, Faculty of Pharmacy, Kuwait University  
11 E-mail: albassam@hsc.edu.kw  
12

13  
14 **2. Abdelmoneim Awad, PhD – Corresponding Author**

15  
16 Professor  
17 Department of Pharmacy Practice, Faculty of Pharmacy, Kuwait University, Kuwait  
18 E-mail: [amoneim@hsc.edu.kw](mailto:amoneim@hsc.edu.kw)  
19 Tel: +965-24636914  
20 Fax: +965-24636840  
21 ORCID:0000-0002-2266-3687  
22  
23  
24  
25  
26

27 **Sources of support:** This research received no specific grant from any funding agency in the  
28 public, commercial or not-for-profit sectors.  
29  
30

31 **Word count for the paper's text:** 3993

32  
33 **Word count for abstract:** 292

34  
35 **Number of figures:** 3

36  
37 **Number of tables:** 2

38  
39 **Conflict of Interest declaration:** We have read and understood the BMJ policy on declaration of  
40 interests and declare that we have no competing interests with regard to the data produced  
41  
42  
43  
44  
45  
46  
47  
48  
49  
50  
51  
52  
53  
54  
55  
56  
57  
58  
59  
60

**ABSTRACT**

**Objectives:** This study was designed to identify the services provided by community pharmacists in Kuwait and their views regarding self-care in pregnancy and lactation. In addition, it determined the pharmacists' recommendations for treatment of pregnancy and breastfeeding related ailments.

**Design:** Cross-sectional survey.

**Setting:** Community pharmacies in Kuwait.

**Participants:** 207 pharmacies were randomly selected from the Ministry of Health database. One registered pharmacist was approached from each pharmacy. 192 (92.8%) pharmacists agreed to participate and completed a self-administered questionnaire.

**Outcomes:** Services most regularly offered by pharmacists to pregnant and lactating women, pharmacists' recommendations (services) for common and specific ailments during pregnancy and breastfeeding, and pharmacists' views about self-care in pregnancy and breastfeeding.

**Results:** The top services provided to pregnant and lactating women were recommending vitamins and food supplements (89.8%) and contraception advice (83.4), respectively. More than half of participants indicated that they would recommend medications for headache, constipation, cough, runny nose, sore throat, nausea/vomiting, indigestion, sore or cracked nipple and insufficient milk. Diarrhea, hemorrhoids, insomnia, varicose vein, swelling of the feet and legs, vaginal itching, back pain, fever, mastitis and engorgement were frequently referred to the physician. Recommendations on medication use were occasionally inappropriate in terms of unneeded drug therapy, off-label use, and safety. More than half of pharmacists agreed that they have sufficient knowledge (61.5%; 50.5%) and confidence (58.3%; 53.1%) about offering advice and solving medication and health problems of pregnant and lactating women, respectively. Most of the respondents (88.5%) agreed that a continuing education program on this topic would be of value and priority for their practice.

1 **Conclusion** The present findings show that respondents had different approaches towards  
2  
3 responding to pregnancy and lactation related ailments; and also highlight the need for multifaceted  
4  
5 interventions to enhance pharmacists' role in improving maternal health.  
6  
7

8  
9  
10 **Keywords:** Community pharmacists, pregnancy, breastfeeding, self-care, self-medication, Kuwait  
11  
12

### 13 **Strengths and limitations of this study**

- 14
- 15 ➤ The strength of this survey included the high response rate, which could indicate the importance  
16  
17 of this topic to community pharmacists and the length of time that they were willing to spend on  
18  
19 completing the questionnaire.  
20  
21
  - 22 ➤ Further strength was the proper sample size and sampling method to produce a representative  
23  
24 data regarding the study population; therefore, the present findings can be generalized at the  
25  
26 community pharmacists level in Kuwait.  
27  
28
  - 29 ➤ In addition, this study fills in a gap in the limited existing literature in the developing countries  
30  
31 and provides useful pieces of information for community pharmacists' services for pregnant and  
32  
33 lactating women in the Middle Eastern region.  
34  
35
  - 36 ➤ Limitations of this study include that it is a theoretical survey that did not truly assess real-life  
37  
38 situations; therefore, the extent of being definitely sure that respondents perform what they  
39  
40 declare when responding to the questionnaire is not possible and open to recall bias or error.  
41  
42
  - 43 ➤ Further limitation was the cross-sectional design of the study that represented one point in time;  
44  
45 hence, did not reflect any alterations in participants' opinions over time regarding responding to  
46  
47 ailments during pregnancy and lactation.  
48  
49  
50  
51  
52  
53  
54  
55  
56  
57  
58  
59  
60

## INTRODUCTION

1  
2  
3 Self-care is defined as “ *the action individuals take for themselves and their families to stay healthy*  
4 *and take care of minor and long term conditions, based on their knowledge and the information*  
5 *available, and working in collaboration with health and social care professionals where*  
6 *necessary*”.<sup>1</sup> Self-medication is a part of self-care behaviors, which is mainly considered in  
7  
8 developed countries for minor illnesses by using over-the-counter (OTC) medications, while in  
9  
10 developing countries is for both minor and major illnesses as a wider spectrum of medications is  
11  
12 available from community pharmacies without a prescription.<sup>2</sup>  
13  
14  
15  
16  
17  
18  
19  
20  
21

22 The prevalence of self-medication throughout pregnancy was found to be in the range between  
23  
24 25.1% and 68.3%.<sup>3-7</sup> The most commonly used OTC medications were analgesics, cough and  
25  
26 common cold remedies, allergy products, laxatives, antacids, vitamins, antibiotics and herbal  
27  
28 products.<sup>4 6 8</sup> The rates of self-medication among breastfeeding women ranged between 17% and  
29  
30 52.4%.<sup>9 10</sup> The most used OTC medicines were analgesics, antispasmodics, laxatives, and nasal  
31  
32 decongestants.<sup>9</sup> The effect of medication use during pregnancy and lactation is a major worry for  
33  
34 both women and healthcare practitioners.<sup>11</sup> Hence, there is a need for professional guidance for  
35  
36 selection of appropriate and safe OTC medicines for each ailment. In 2011, the International  
37  
38 Pharmaceutical Federation (FIP) Council approved a document on the valuable pharmacists’ roles  
39  
40 to improve maternal, newborn, and child health. These roles have been structured in accordance  
41  
42 with the FIP/WHO (World Health Organization) Guidelines on Good Pharmacy Practice.<sup>12</sup>  
43  
44  
45  
46  
47  
48  
49  
50

51 Previous studies have evaluated the role of community pharmacists in providing advice or  
52  
53 counselling regarding pregnancy and lactation related ailments. A study from Israel showed that  
54  
55 only 9% of community pharmacists reported asking the women to elucidate whether or not they are  
56  
57 pregnant or lactating.<sup>13</sup> In Rhode Island, the USA 42% of community pharmacists indicated that  
58  
59  
60

1 they asked women about breastfeeding before providing services.<sup>14</sup> A study in Nebraska, the USA  
2  
3 reported a variation in community pharmacists' responses to whether they would recommend  
4  
5 medications for seven common OTC-treatable conditions in pregnancy and breastfeeding. Also,  
6  
7 some of the respondents recommended unsafe medications.<sup>15</sup> The results of a study conducted in  
8  
9 France revealed that medications were often recommended by community pharmacists for pain,  
10  
11 fever, nose and oropharynx disorders, venous insufficiency, dyspepsia and constipation. Overall,  
12  
13 pharmacists sometimes provided inappropriate advice including medications that were potentially  
14  
15 harmful in pregnancy.<sup>16</sup> A study that was performed in three countries: the Netherlands, Canada,  
16  
17 and Iceland showed that most of the pharmacists were unable to provide evidence-based  
18  
19 recommendation and 90% of them recommended referral to the physician.<sup>17</sup> In Thailand, a study  
20  
21 reported that about 75% of community pharmacists treated headache, runny nose and sore throat  
22  
23 with medicines. Over half of the respondents indicated that they were confident and have adequate  
24  
25 knowledge about providing advice and solving medication and health problems for women during  
26  
27 pregnancy and breastfeeding.<sup>18</sup> A study conducted in Serbia and Norway reported that several  
28  
29 respondents' recommendations on medications use were inappropriate.<sup>19</sup>  
30  
31  
32  
33  
34  
35  
36  
37  
38

39 Additional studies regarding community pharmacists' services for pregnant and lactating women  
40  
41 still necessary to be performed, particularly in developing countries where most of medications can  
42  
43 be obtained from the pharmacy without prescription. To our knowledge, there are no published data  
44  
45 that evaluate the role of community pharmacists in advising and recommending medications for  
46  
47 pregnant and lactating women in the Eastern Mediterranean region, including Kuwait. Such study is  
48  
49 highly warranted since community pharmacists should have a crucial role in sustaining positive  
50  
51 behaviors in self-care by providing the proper evidence-based information and supporting the public  
52  
53 to maintain a healthy lifestyle. Hence, this study was designed to identify the services provided by  
54  
55 community pharmacists regarding self-care in pregnancy and lactation, determine the pharmacists'  
56  
57  
58  
59  
60

1 recommendations (services) for treatment of pregnancy and lactation related ailments, and identify  
2  
3 their views about self-care during pregnancy and lactation.  
4  
5  
6  
7

## 8 **METHODS**

9  
10 The study design was descriptive and cross-sectional. It was performed in Kuwait, a Middle-  
11 Eastern country with an area of 17,820 km<sup>2</sup> and an approximate population of 3,065,850 individuals  
12 (2011 estimate).<sup>20</sup> It was conducted during the period from March to December 2015. The study  
13 population were employed community pharmacists in Kuwait. Ethical approval was received from  
14 the “Ministry of Health Ethical Committee, Kuwait”.  
15  
16  
17  
18  
19  
20  
21  
22  
23

24 PS power and sample size calculator V.3.05 was used to determine the sample size.<sup>21</sup> One hundred  
25 and eight six pharmacists would be needed to determine a 20% difference in proportion between  
26 two groups (e.g., male vs. female) with an 80% power and a 5% significance level. Presuming a  
27 response rate of 90%, a sample size of 207 community pharmacies were randomly selected from the  
28 six governorates using stratified and systematic random sampling.<sup>22</sup> Due to the lack of lists with the  
29 names and addresses of community pharmacists in Kuwait, lists of community pharmacies at the  
30 various governorates were acquired from the Ministry of Health. The lists included a total of 348  
31 pharmacies distributed among the six governorates of Kuwait. Only one full-licensed pharmacist  
32 was approached from pharmacies hiring more than one pharmacist. The aim of the survey was  
33 concisely explained to the pharmacist on duty (face-to face). Pharmacists were free to refuse to take  
34 part in the study. Those who agreed to participate in the survey were handed the questionnaires and  
35 then were gathered from them anonymously after being completed within one to two weeks. The  
36 study participants offered written consent to take part in the survey.  
37  
38  
39  
40  
41  
42  
43  
44  
45  
46  
47  
48  
49  
50  
51  
52  
53  
54  
55  
56  
57  
58  
59  
60

1 The study survey was adapted from validated questionnaires that were previously used in Thailand  
2 and France.<sup>16 18</sup> A research group at Kuwait University established the content validity of the  
3 adapted survey. Its face validity was assessed with 5 community pharmacists for clarity of  
4 questions. Then the survey was pretested on 10 community pharmacists, and refinements were  
5 made as needed so that the survey was simple to comprehend and answer.  
6  
7  
8  
9  
10  
11  
12  
13

14 The pre-tested survey contained four sections. Demographic and other characteristics of  
15 respondents were included in the first section (Table 1). Section two contained eleven questions to  
16 provide information about the services provided by the community pharmacists regarding self-care  
17 in pregnancy and lactation. These questions were about the availability of information leaflet or  
18 brochure to promote health for pregnant and breastfeeding women, experience with pregnant and  
19 breastfeeding women, number of pregnant and breastfeeding women who visited the pharmacy per  
20 week, the three services most commonly provided for pregnant and breastfeeding women, the two  
21 symptoms and/or questions that both pregnant and breastfeeding women most frequently consulted  
22 the pharmacists in the past, and how do they know that women are pregnant or breastfeeding. Seven  
23 of the above questions were close-ended and their options were presented in the results section. The  
24 third section included 16 common symptoms in pregnancy and 12 common symptoms in  
25 breastfeeding for which pregnant and breastfeeding women often seek advice from pharmacists.  
26 They were asked to indicate the recommendations (services) that they will provide for each  
27 symptom if being consulted by a pregnant or breastfeeding women. They were needed to select  
28 from three options for each ailment as they would be in real life situations: refer to a doctor,  
29 dispense medicine, and provide only advice without medicine dispensation. If they decided to  
30 dispense medications, they were asked to indicate the names of the medications. The results for this  
31 section were presented in three parts: eight common minor symptoms in both pregnant and  
32 breastfeeding women, eight specific pregnancy symptoms and four specific breastfeeding symptoms  
33  
34  
35  
36  
37  
38  
39  
40  
41  
42  
43  
44  
45  
46  
47  
48  
49  
50  
51  
52  
53  
54  
55  
56  
57  
58  
59  
60

1 (Figures 1, 2 and 3, respectively). The final section included twelve statements to identify the  
2  
3 pharmacists' views about self-care in pregnancy and breastfeeding (Table 2). The responses were  
4  
5 measured using a 5-point Likert scale (strongly disagree, disagree, neither agree nor disagree  
6  
7 (neutral), agree, and strongly agree). In addition to three questions to determine the pharmacists  
8  
9 need for continuing education about self-care in pregnancy and breastfeeding, the convenient  
10  
11 method of delivering the continuing education for them, and the most common source of  
12  
13 information used by them to prepare themselves for responding to symptoms during pregnancy and  
14  
15 lactation.  
16  
17  
18  
19  
20  
21

22 Data analysis was conducted using the Statistical Package for Social Sciences (SPSS, version 23,  
23  
24 SPSS, Chicago, IL, U.S.A.). Pharmacists' responses were presented as percentages (95%  
25  
26 confidence intervals; CI) and medians (interquartile ranges; IQR). To simplify the results'  
27  
28 presentation in the text, those who answered "strongly agree" or "agree" were classified as  
29  
30 "agreed", and those who answered "strongly disagree" or "disagree" as having disagreed. The  
31  
32 internal consistency for the sections to determine the pharmacists' views about self-care in  
33  
34 pregnancy and breastfeeding was assessed using Cronbach's  $\alpha$  test. The test results were as follows:  
35  
36 four statements of support self-care, 0.84; two statements about the safety of OTC medicines, 0.91,  
37  
38 four statements about knowledge and confidence about pregnancy and breastfeeding, 0.79, and two  
39  
40 statements about undergraduate training in self-care for both pregnant and breastfeeding women,  
41  
42  
43  
44  
45  
46 0.97.  
47  
48  
49  
50

51 The univariate logistic regression was used first to evaluate the association of respondents'  
52  
53 characteristics with the dependent variables. All variables with  $p < 0.25$  in the univariate analysis  
54  
55 were included in the multivariate logistic regression analysis to determine the factors that are  
56  
57 independently associated with each of the dependent variables. Only the results of multivariate  
58  
59  
60

1  
2  
3  
4  
5  
6  
7  
8  
9  
10  
11  
12  
13  
14  
15  
16  
17  
18  
19  
20  
21  
22  
23  
24  
25  
26  
27  
28  
29  
30  
31  
32  
33  
34  
35  
36  
37  
38  
39  
40  
41  
42  
43  
44  
45  
46  
47  
48  
49  
50  
51  
52  
53  
54  
55  
56  
57  
58  
59  
60

logistic analysis are reported showing odds ratio (OR) and 95% CI. Statistical significance was accepted at  $p < 0.05$ .

For peer review only

## RESULTS

One hundred and ninety-two (92.8%) pharmacists agreed to participate in the study. Their median (IQR) age and experience as practitioners were 35 (11) years and 11 (7) years, respectively. Table (1) shows the respondents' characteristics.

Above two-fifths (n=85; 44.3%; 95% CI: 37.2- 51.6) of participants have information leaflets or brochures to promote health for pregnancy and lactation, and most of these were from pharmaceutical companies (66%). Most of the respondents had experience with pregnant (n =186; 96.9%; 95% CI: 93.0-98.7) and breastfeeding (n=181; 94.3%; 95% CI: 89.7-97.0) women. The median (IQR) numbers of pregnant women and breastfeeding women who visited the community pharmacy per week were 10 (7) and 6 (3), respectively.

Community pharmacists who reported to have experience with pregnant and breastfeeding women were asked to indicate the most frequently provided services. The top three services provided for pregnant women were recommending vitamins and food supplements (n=167; 89.8%; 95% CI: 84.3-93.6), referral to a doctor (n=126; 67.7%; 95% CI: 60.5-74.3), and providing advice about suitable behavior such as lifestyle and exercise (n=115; 61.8%; 95% CI: 54.4-68.8). Other offered services, but to a lesser extent, were diagnosis of symptoms and dispensing of medicines (n=100; 53.8%; 95% CI: 46.3-61.0) and herbal products (n=80; 43.0%; 95% CI: 35.9-50.5). The three services most frequently provided to breastfeeding women were contraception advice (n=151; 83.4%; 95% CI: 77.0-88.4), recommending vitamins and food supplements (n=101; 55.8%; 95% CI: 48.3-63.1), and weight control advice (n=92; 50.8%; 95% CI: 43.3-58.3). Other offered services, but to a lesser extent, were diagnosis of symptoms and dispensing of herbal products (n=88; 48.6%; 95% CI: 41.2-56.1) and medicines (n=69; 38.1%; 95% CI: 31.1- 45.7), and referral to a doctor (n=58; 32.0%; 95% CI: 25.4-39.4). About three-fifths (n=106; 58.6%; 95% CI: 51.0-

1 65.8) of respondents stated that they knew women are pregnant or breastfeeding by asking them,  
2  
3 while 41.4% (n=75; 95% CI: 34.3-49.0) reported that women inform them before asking about the  
4  
5 services.  
6  
7

8  
9  
10 Moreover, respondents indicated the symptoms and/or questions that most frequently been  
11  
12 consulted about the past. They were most frequently consulted by pregnant women regarding  
13  
14 gastrointestinal symptoms (nausea/vomiting, constipation, and stomach cramp), respiratory  
15  
16 symptoms (common cold and cough), safety of medicine use in pregnancy, and back pain.  
17  
18 Breastfeeding women most frequently consulted them about a medicine to increase breast milk,  
19  
20 contraceptive pills, safety of medicine use in breastfeeding, and respiratory symptoms (common  
21  
22 cold and cough).  
23  
24  
25  
26  
27

28  
29 Figure (1) presents the distribution of pharmacists' responses to the most commonly treated  
30  
31 symptoms during pregnancy and breastfeeding. Most of the pharmacists recommended medicines or  
32  
33 referral to a doctor rather than providing advice only without medicine dispensation for treatment of  
34  
35 these symptoms. More than half of participants recommended medications for treatment of  
36  
37 headache, constipation, cough, sore throat, and runny nose. In relation to diarrhea and hemorrhoids,  
38  
39 about three-fifths and half of respondents recommended referral to a doctor rather than dispensing  
40  
41 medicines or providing only advice, respectively. There were significant associations between the  
42  
43 recommendation to dispense medicines for treatment of diarrhea or constipation in breastfeeding  
44  
45 women and the respondents' experience as practitioners ( $p < 0.05$ ). It was found to be more common  
46  
47 among those with experience of  $> 10$  years compared to those with experience of  $< 10$  years (for  
48  
49 diarrhea:  $p = 0.02$ ; OR = 2.0; 95% CI: 1.1-3.5) and (for constipation:  $p = 0.02$ ; OR = 2.2; 95% CI: 1.1-  
50  
51 4.2).  
52  
53  
54  
55  
56  
57  
58  
59  
60

1 Figure (2) presents the distribution of pharmacists' responses to the specific symptoms in  
2 pregnancy. Over half of respondents recommended referral of pregnant women to the doctor for  
3 swelling of the feet and legs, varicose vein, insomnia, vaginal itching, back pain, and fever and  
4 aches. More than two-thirds of participants recommended dispensing of medications for treatment  
5 of nausea, vomiting, and indigestion. There was a significant association between the  
6 recommendation to dispense medicines for nausea/vomiting and the pharmacists' experience as  
7 practitioners ( $p < 0.05$ ). It was found to be more common among those with experience of  $> 10$   
8 years compared to those with experience of  $< 10$  years ( $p = 0.03$ ; OR = 2.6; 95% CI: 1.1-6.5). The  
9 recommendation to dispense medicines for treatment of vaginal itching was significantly more  
10 common among females compared to males ( $p = 0.01$ ; OR = 2.3; 95% CI: 1.2-4.4).  
11  
12  
13  
14  
15  
16  
17  
18  
19  
20  
21  
22  
23  
24  
25  
26

27 Figure (3) presents the distribution of pharmacists' responses to the specific symptoms in  
28 breastfeeding. Pharmacists mainly recommended dispensing of medications for sore or cracked  
29 nipple and to increase the breast milk, and referral to the doctor for mastitis. There were significant  
30 associations between the recommendation to dispense medicine to relieve engorgement or increase  
31 the breast milk and gender. It was found to be more prevalent among females compared to males  
32 (for engorgement:  $p = 0.01$ ; OR = 2.2; 95% CI: 1.1-4.1) and (for insufficient milk:  $p = 0.03$ ; OR = 2.5;  
33 95% CI: 1.1-5.9).  
34  
35  
36  
37  
38  
39  
40  
41  
42  
43  
44  
45

46 The medications that respondents recommended for each of the symptoms during pregnancy and  
47 breastfeeding are presented in the supplementary file. Most medicines that were recommended are  
48 not detrimental to the mother, fetus and infant. However, the respondents' recommendations on  
49 medicine use were sometimes inappropriate. Respondents sometimes recommended ibuprofen for  
50 headache, antibiotics for sore throat and productive cough, herbal products for cough, loratadine for  
51 runny nose and productive cough, stimulant laxatives for constipation, loperamide for diarrhea, St  
52  
53  
54  
55  
56  
57  
58  
59  
60

1 John's wort and melatonin for insomnia, topical products with no evidence to heal a nipple,  
2  
3 paracetamol, moisturizing cream and domperidone for engorgement, and herbal products that  
4  
5 contain fenugreek for insufficient milk.  
6

7  
8 Table (2) shows the respondents' views regarding self-care of pregnant and breastfeeding women.  
9  
10 In the first dimension about self-care support, above half of respondents agreed that pharmacists are  
11  
12 qualified to provide advice and an OTC therapy to treat symptoms in pregnant (58.9%) and  
13  
14 breastfeeding (65.1%) women. However, less than half of participants agreed that pharmacists  
15  
16 should recommend an OTC therapy to treat symptoms in pregnant (39.1%) and breastfeeding  
17  
18 (46.9%) women. In the second dimension about safety, more than two-fifths of participants  
19  
20 disagreed about the safety of OTC medicines for pregnant (51.6%) and breastfeeding (43.8%)  
21  
22 women. In the third dimension about knowledge and confidence, more than half of pharmacists  
23  
24 agreed that they are confident about providing advice and counselling to pregnant (58.3%) and  
25  
26 breastfeeding (53.1%) women; and that they have adequate knowledge to solve medication and  
27  
28 health problems of pregnant (61.5%) and breastfeeding (50.5%) women. In the last dimension about  
29  
30 undergraduate training, four-in ten responders agreed that pharmacy schools provided appropriate  
31  
32 training to provide advice and an OTC therapy for pregnant (44.3%) and breastfeeding (42.2%)  
33  
34 women. The agreement that OTC medicines are safe was significantly higher among females  
35  
36 compared to males ( $p=0.04$ ; OR = 2.1; 95% CI: 1.0-4.3).  
37  
38  
39  
40  
41  
42  
43  
44  
45

46 Most of the respondents ( $n=170$ ; 88.5%; 95% CI: 83.0-92.5) agreed that a continuing education  
47  
48 program regarding this topic would be of value and priority for their practice. Attending  
49  
50 lectures/workshops/seminars ( $n=80$ ; 47.1%) was the most convenient method of delivering  
51  
52 continuing education for them, followed by receiving regular newsletters ( $n=61$ ; 35.9%), and  
53  
54 receiving distant learning packages ( $n=34$ ; 20%). There was no significant association between the  
55  
56 respondents' need for continuing education and the independent variables ( $p > 0.05$ ). The most  
57  
58  
59  
60

1 commonly indicated sources of information used by respondents to prepare themselves for  
2  
3 responding to symptoms in pregnancy and breastfeeding was the websites (n=133; 69.2%),  
4  
5 followed by books (n=99; 51.5 %), and journal articles (n=19; 9.9%).  
6  
7

## 8 **DISCUSSION**

9  
10 The present results showed that community pharmacists in Kuwait are frequently consulted by  
11  
12 pregnant and breastfeeding women. Most of the pharmacists recommended medicines or referral to  
13  
14 a doctor rather than providing advice only for the treatment of pregnancy and breastfeeding related  
15  
16 ailments. Recommendations on medication use were occasionally inappropriate in terms of  
17  
18 unneeded drug therapy, off-label use, and safety. Some community pharmacists still lack confidence  
19  
20 and knowledge to provide advice and resolve health and medication problems of pregnant and  
21  
22 lactating women. To our knowledge, this is the first study to be performed in Kuwait, and likely in  
23  
24 the Middle Eastern area, and it contributes to the limited amount of existing literature in the  
25  
26 developing countries about the services provided by community pharmacists for women during  
27  
28 pregnancy and lactation. The present results present a baseline quantitative data of these services  
29  
30 that will aid in the assessment of the current pharmacy practices towards self-care during pregnancy  
31  
32 and lactation, and offer additional insight in designing future multifaceted interventions to improve  
33  
34 the community pharmacists' role to deliver the proper advice and resolve the healthcare matters of  
35  
36 pregnant and lactating women in Kuwait.  
37  
38  
39  
40  
41  
42  
43  
44  
45  
46

47 The present findings show that the number of pregnant and lactating women who visited the  
48  
49 pharmacy per week was 10 and 6, respectively. These results are higher than that reported in the  
50  
51 USA and Thailand, where pharmacists provided advice for 2.2 to 2.8 pregnant and lactating women  
52  
53 per week.<sup>15 18</sup> The current results reveal that the services most regularly offered to pregnant and  
54  
55 lactating women were recommending vitamin or food supplements, referral to a doctor,  
56  
57 contraception advice, and weight control advice. These results are close to that indicated in the Thai  
58  
59  
60

1 study, with the exception that symptom diagnosis and medicine dispensing was a commonly  
2 provided service in Thailand.<sup>18</sup> The study population indicated that pregnant and lactating women  
3 most frequently consulted them regarding gastrointestinal symptoms, respiratory symptoms, and  
4 safety of medicine use. It was reported that most people considered these gastrointestinal and  
5 respiratory symptoms as minor ailments that can be treated by using OTC medicines that they tend  
6 to purchase from a community pharmacy.<sup>18 29</sup> The finding that respondents were also frequently  
7 consulted about the safety of medicines use in pregnancy and lactation is in accordance with a  
8 previous report, which has shown that women require information regarding medication use during  
9 pregnancy and indicated pharmacists amongst the three mainly utilized sources of information.<sup>30</sup>  
10 These findings indicate that women with pregnancy and lactation related ailments were more  
11 tending to visit a pharmacist than a physician. This could be partly explained by the easy access to  
12 the community pharmacies, it is evident that community pharmacies are recognized as the utmost  
13 reachable healthcare settings due to the high volume of the public that utilize their services.<sup>23</sup>  
14 Furthermore, it may be due to the observation of the pharmacists by the pregnant and breastfeeding  
15 women as the self-care consultant who provide them with enough time to discuss their health  
16 problems and prefer to get advice from a pharmacist rather than from a physician when they have  
17 non-serious condition.<sup>24-28</sup> These findings indicate the relevance of maternal-fetal medication as a  
18 crucial area for pharmacy practice, which needs the pharmacists to have adequate knowledge and a  
19 responsible framework in paying particular attention when these women request advice to improve  
20 maternal health. This is confirmed by the finding that 88.5% of respondents agreed that a continuing  
21 education regarding self-care for pregnant and breastfeeding women would be of value and priority  
22 for their practice.

23  
24  
25  
26  
27  
28  
29  
30  
31  
32  
33  
34  
35  
36  
37  
38  
39  
40  
41  
42  
43  
44  
45  
46  
47  
48  
49  
50  
51  
52  
53  
54 Respondents were also asked about the services that they would recommend for pregnancy and  
55 lactation related ailments. More than half of pharmacists indicated that they would recommend  
56 medications for headache, constipation, cough, runny nose, sore throat, as well as, nausea/vomiting,  
57  
58  
59  
60

1 indigestion, sore or cracked nipple and insufficient milk. Diarrhea, hemorrhoids, insomnia, varicose  
2  
3 vein, swelling of the feet and legs, as well as, vaginal itching/simple discharge, back pain, fever and  
4  
5 aches, mastitis and engorgement were frequently referred to the physician. In comparison to  
6  
7 previous reports, a study conducted in France revealed that medications were often recommended  
8  
9 by pharmacists for pain, fever, nose and oropharynx disorders, venous insufficiency, dyspepsia and  
10  
11 constipation. They recommended referral to the doctor for nausea/vomiting and back pain.<sup>16</sup> In  
12  
13 Thailand, about 75% of pharmacists treated headache, runny nose and sore throat with medicines.  
14  
15 Providing only advice without the dispensation of medicine was mainly recommended for  
16  
17 constipation, backache, indigestion, varicose vein, insomnia and engorgement. They mainly referred  
18  
19 women with vaginal itching and simple discharge, and swelling of the feet and legs to the doctor.<sup>18</sup>  
20  
21 A recent study reported that 52% of pharmacists in Serbia recommended medication use for  
22  
23 treatment of back pain, heavy legs, nausea, common cold and constipation during pregnancy, while  
24  
25 62% of respondents in Norway recommended non-pharmacological advice as well as referral to a  
26  
27 doctor.<sup>19</sup> These findings illustrate the large differences in community pharmacists practices between  
28  
29 countries regarding the services recommended for treatment of pregnancy and lactation related  
30  
31 ailments. This could be partly explained by the differences in regulatory environments, types of  
32  
33 undergraduate programs, and the availability of products at the local pharmacies. The finding that  
34  
35 less than one-tenth of the participants recommended only advice for most of the symptoms  
36  
37 underscores the need for pharmacists to have sufficient knowledge and information about self-care  
38  
39 practices which are crucial to alleviate some ailments without medications. The pharmacist must  
40  
41 have adequate information to reach a conclusion about the risk: benefit ratio of treatment for the  
42  
43 women to be able to counsel them effectively.  
44  
45  
46  
47  
48  
49  
50  
51  
52  
53  
54

55 In the present study, recommendations on medication use were occasionally inappropriate in terms  
56  
57 of unneeded drug therapy, off-label use, and safety. Previous studies showed that community  
58  
59  
60

1 pharmacists were incapable to offer adequate evidence-based information about use of medicines  
2  
3 during pregnancy.<sup>15 17</sup> These results demonstrate that respondents have different knowledge levels  
4  
5 in the subject of maternal-fetal medicine. This is confirmed by the findings that about two-fifths of  
6  
7 respondents did not agree that they have confidence and aknowledge about giving advice and  
8  
9 resolving medication and health problems of pregnant and lactating women. In addition, over half of  
10  
11 participants reported that pharmacy schools did not provide appropriate training regrading advice  
12  
13 and OTC therapy for pregnant and lactating women. These results underscore the need for  
14  
15 continuing professional development and the revision of the undergraduate pharmacy curriculum to  
16  
17 fill the knowledge gaps of pharmacy students and practitioners in maternal-fetal medicine and to  
18  
19 support pharmacists to deliver the proper care for pregnant and lactating women.  
20  
21  
22  
23  
24  
25

26 The current findings reveal that pharmacists with experience of more than 10 years recommended to  
27  
28 dispense medicines for diarrhea, constipation, and nausea/vomiting more than those with less  
29  
30 experience. This might be due to that their knowledge base in the area of pregnancy and  
31  
32 breastfeeding related ailments relies on experience gained in practice. Also, it was found that female  
33  
34 respondents recommended to dispense medications for vaginal itching/simple discharge,  
35  
36 engorgement, and insufficient milk more than males. This could be explained by the fact that female  
37  
38 pharmacists have more exposure to pregnancy-related issues, either personal or work experience for  
39  
40 pregnant or lactating women tend to discuss their concerns more comfortable with female than male  
41  
42 pharmacists. Another possible reason demonstrated by this study was their agreement that OTC  
43  
44 medicines are safe, which was significantly higher than males. Further qualitative research is  
45  
46 needed for describing and understanding these predictors.  
47  
48  
49  
50  
51  
52  
53  
54

## 55 **Conclusions**

56  
57  
58  
59  
60

1 The present results reveal that community pharmacists in Kuwait are frequently consulted by  
2 pregnant and breastfeeding women and that the pharmacists had different approaches towards  
3 responding to pregnancy and lactation related ailments. Also highlight the need for multifaceted  
4 interventions, including continuing professional development and the revision of the undergraduate  
5 pharmacy curriculum to fill the knowledge gaps of pharmacy students and practitioners in maternal-  
6 fetal medicine and to enhance pharmacists' role in improving maternal health.  
7  
8  
9  
10  
11  
12  
13

### 14 **Acknowledgements**

15 We appreciate the participation of the community pharmacists in this study. We gratefully  
16 acknowledge the contribution of pharmacist Moodi Al-Asfour in pretesting the study questionnaire  
17 and data collection.  
18  
19  
20  
21  
22  
23  
24  
25  
26  
27  
28

29 **Authors' contributions** AB contributed in data collection, analysis and interpretation, and wrote  
30 the manuscript. AA designed and supervised the study, performed the data analysis and reviewed  
31 the manuscript critically for important intellectual content. Both authors read and approved the final  
32 manuscript.  
33  
34  
35  
36  
37  
38  
39  
40

41 **Data sharing statement** The raw data of the present study are available from the corresponding  
42 author on reasonable request.  
43  
44  
45  
46  
47  
48  
49  
50  
51  
52  
53  
54  
55  
56  
57  
58  
59  
60

1  
2  
3  
4  
5  
6  
7  
8  
9  
10  
11  
12  
13  
14  
15  
16  
17  
18  
19  
20  
21  
22  
23  
24  
25  
26  
27  
28  
29  
30  
31  
32  
33  
34  
35  
36  
37  
38  
39  
40  
41  
42  
43  
44  
45  
46  
47  
48  
49  
50  
51  
52  
53  
54  
55  
56  
57  
58  
59  
60

For peer review only

1  
2  
3  
4  
5  
6  
7  
8  
9  
10  
11  
12  
13  
14  
15  
16  
17  
18  
19  
20  
21  
22  
23  
24  
25  
26  
27  
28  
29  
30  
31  
32  
33  
34  
35  
36  
37  
38  
39  
40  
41  
42  
43  
44  
45  
46  
47  
48  
49  
50  
51  
52  
53  
54  
55  
56  
57  
58  
59  
60  
**REFERENCES**

1. World self-medication industry (WSMI). WSMI declaration on self-care and self-medication, 2006. <http://www.wsmi.org/wsmi-declaration-on-self-care-and-self-medication-2/>. (accessed 07 Feb 2017).
2. Geissler PW, Nokes K, Prince RJ, *et al*. Children and medicines: Self-treatment of common illnesses among Luo schoolchildren in western Kenya. *Soc Sci Med* 2000;50:1771-83.
3. Buitendijk S, Bracken MB. Medication in early pregnancy: Prevalence of use and relationship to maternal characteristics. *Am J Obstet Gynecol* 1991;165:33-40.
4. Aviv RI, Chubb K, Lindow SW. The prevalence of maternal medication ingestion in the antenatal period. *S Afr Med J* 1993;83:657-60.
5. Abeje G, Admasie C, Wasie B. Factors associated with self medication practice among pregnant mothers attending antenatal care at governmental health centers in Bahir Dar city administration, Northwest Ethiopia, a cross sectional study. *Pan Afr Med J* 2015;20:276.
6. Yusuff KB, Omarusehe LD. Determinants of self medication practices among pregnant women in Ibadan, Nigeria. *Int J Clin Pharm* 2011;33:868-75.
7. Kulkarni PK. IM, Chandrasekhar A Selfmedication practice among urban slum dwellers in south Indian city. *IJPBS* 2012;3:81-7.
8. Westfall RE. Herbal healing in pregnancy: women's experiences. *J Herb Pharmacother* 2003;3:17-39.
9. Chaves RG, Lamounier JA, César CC. Self-medication in nursing mothers and its influence on the duration of breastfeeding. *J Pediatr (Rio J)* 2009;85:129-34.
10. Al-Sawalha NA, Tahaineh L, Sawalha A, *et al*. Medication Use in Breastfeeding Women: A National Study. *Breastfeed Med* 2016;11:386-91.
11. Lagoy CT, Joshi N, Cragan JD, *et al*. Medication use during pregnancy and lactation: an urgent call for public health action. *J Womens Health (Larchmt)* 2005;14:104-9.

- 1 12. International Pharmaceutical Federation (FIP). International Pharmaceutical Federation  
2 report on effective use of pharmacists in improving maternal, newborn and child health  
3 (MNCH), 2011. [http://www.who.int/pmnch/media/news/2012/20120223\\_fip\\_paper/en/](http://www.who.int/pmnch/media/news/2012/20120223_fip_paper/en/).  
4  
5  
6 (accessed 11 Feb 2017).  
7  
8
- 9 13. Merlob P, Stahel B, Kaplan B. Drug use in pregnancy and breast feeding: the role of the  
10 pharmacist. *Int J Risk Saf Med* 1998;11:45-7.  
11
- 12 14. Ronai C, Taylor JS, Dugan E, *et al*. The identifying and counseling of breastfeeding women  
13 by pharmacists. *Breastfeed Med* 2009;4:9-15.  
14
- 15 15. Schrempp S, Ryan-Haddad A, Gait KA. Pharmacist counseling of pregnant or lactating  
16 women. *J Am Pharm Assoc (Wash)* 2001;41:887-90.  
17
- 18 16. Damase-Michel C, Vié C, Lacroix I, *et al*. Drug counselling in pregnancy: an opinion survey  
19 of French community pharmacists. *Pharmacoepidemiol Drug Saf* 2004;13:711-5.  
20
- 21 17. Lyszkiewicz DA, Gerichhausen S, Björnsdóttir I, *et al*. Evidence based information on drug  
22 use during pregnancy: a survey of community pharmacists in three countries. *Pharm World*  
23 *Sci* 2001;23:76-81.  
24
- 25 18. Sathon B. Self-care in pregnancy and breastfeeding: views of women and community  
26 pharmacists in Thailand. . Dissertation Nottingham: University of Nottingham, 2010.  
27 <http://eprints.nottingham.ac.uk/11605/>. (accessed 26 Dec 2014).  
28
- 29 19. Odalović M, Milanković S, Holst L *et al*. Pharmacists counselling of pregnant women: Web-  
30 based, comparative study between Serbia and Norway. *Midwifery* 2016;40:79-86.  
31
- 32 20. State of kuwait: General Statistics Bureau. Statistical Review. 39 ed, 2011.  
33 [https://www.csb.gov.kw/Socan\\_Statistic.aspx?ID=6](https://www.csb.gov.kw/Socan_Statistic.aspx?ID=6). (accessed 02 Mar 2017).  
34
- 35 21. Dupont WD, Plummer WD Jr. Power and sample size calculations. version 3.1.2, 2014.  
36 <http://biostat.mc.vanderbilt.edu/wiki/Main/PowerSampleSize>. (accessed 12 Jan 2015).  
37  
38  
39  
40  
41  
42  
43  
44  
45  
46  
47  
48  
49  
50  
51  
52  
53  
54  
55  
56  
57  
58  
59  
60

- 1  
2  
3  
4  
5  
6  
7  
8  
9  
10  
11  
12  
13  
14  
15  
16  
17  
18  
19  
20  
21  
22  
23  
24  
25  
26  
27  
28  
29  
30  
31  
32  
33  
34  
35  
36  
37  
38  
39  
40  
41  
42  
43  
44  
45  
46  
47  
48  
49  
50  
51  
52  
53  
54  
55  
56  
57  
58  
59  
60
22. World Health Organization. How to investigate drug use in health facilities: Selected drug use indicators. Report WHO/DAP/ 93.1, 1993.
  23. Jackson JK SBSM, Duncan GJ, Spinks, JM. Public health - recognising the role of Australian pharmacists. *J Pharm Pract Res* 2004;34:290–2.
  24. Chen J, Britten. Strong medicine': an analysis of pharmacist consultations in primary care. *Fam Pract* 2000;17:480-3.
  25. SA B. Consumer attitudes towards community pharmacy services in Saudi Arabia. *Int J Pharm Pract* 2004;12:83-9.
  26. Wazaify M, Al-Bsoul-Younes A, Abu-Gharbieh E, *et al.* Societal perspectives on the role of community pharmacists and over-the-counter drugs in Jordan. *Pharm World Sci* 2008;30:884-91.
  27. Simoens S, Lobeau M, Verbeke K, *et al.* Patient experiences of over-the-counter medicine purchases in Flemish community pharmacies. *Pharm World Sci* 2009;31:450-7.
  28. Wilbur K, Salam SE, Mohammadi E. Patient perceptions of pharmacist roles in guiding self-medication of over-the-counter therapy in Qatar. *Patient Prefer Adherence* 2010;4:87-93.
  29. Boardman H. Lewis M, Croft P, *et al.* Trinder P, Rajaratnam G. Use of community pharmacies: a population-based survey. *J Public Health (Oxf)* 2005;27:254-62.
  30. Hämeen-Anttila K1, Jyrkkä J, Enlund H *et al.* Medicines information needs during pregnancy: a multinational comparison. *BMJ Open* 2013;3:4.

**Table 1 Characteristics of respondents (n=192)**

|                                                  | Frequency | Percentage (%) |
|--------------------------------------------------|-----------|----------------|
| <b>Gender</b>                                    |           |                |
| Male                                             | 127       | 66.1           |
| Female                                           | 65        | 33.9           |
| <b>Age (years)</b>                               |           |                |
| 20-39                                            | 132       | 68.8           |
| ≥ 40                                             | 60        | 31.2           |
| <b>Basic qualification in pharmacy</b>           |           |                |
| B. Pharm                                         | 177       | 92.2           |
| M. Pharm                                         | 9         | 4.7            |
| Pharm D                                          | 6         | 3.1            |
| <b>Postgraduate qualification(s) in pharmacy</b> |           |                |
| Diploma                                          | 15        | 7.8            |
| Master degree                                    | 12        | 6.2            |
| PhD                                              | 3         | 1.6            |
| <b>Experience as practitioners (Years)</b>       |           |                |
| ≤ 10                                             | 92        | 47.9           |
| > 10                                             | 100       | 52.1           |
| <b>Location of pharmacy (Governorates)</b>       |           |                |
| Hawalli                                          | 57        | 29.7           |
| Al-Farwaniyah                                    | 43        | 22.4           |
| Al-Ahmadi/Mubarak Alkabeer                       | 43        | 22.4           |
| Capital                                          | 25        | 13.0           |
| Al-Jahra                                         | 24        | 12.5           |

Figure 1 Pharmacists' responses to eight common symptoms in pregnancy and breastfeeding (n=192)



er review only

Figure 2 Pharmacists' responses to specific symptoms in pregnancy (n=192)



review only

Figure 3 Pharmacists' responses to specific symptoms in breastfeeding (n=192)



1  
2  
3  
4  
5  
6  
7  
8  
9  
10  
11  
12  
13  
14  
15  
16  
17  
18  
19  
20  
21  
22  
23  
24  
25  
26  
27  
28  
29  
30  
31  
32  
33  
34  
35  
36  
37  
38  
39  
40  
41  
42  
43  
44  
45  
46  
47  
48  
49**Table 2 Respondents views about self-care of pregnant and breastfeeding women (n=192)**

|                                                                                                                                                   | Strongly disagree<br>n (%) | Disagree<br>n (%) | Neutral<br>n (%) | Agree<br>n(%) | Strongly agree<br>n (%) | Median <sup>^</sup><br>(IQR) |
|---------------------------------------------------------------------------------------------------------------------------------------------------|----------------------------|-------------------|------------------|---------------|-------------------------|------------------------------|
| <b>Support self-care</b>                                                                                                                          |                            |                   |                  |               |                         |                              |
| Community pharmacists are qualified to provide advice and an over- the-counter (OTC) therapy to treat common and minor symptoms in pregnant women | 6<br>(3.1)                 | 29<br>(15.1)      | 44<br>(22.9)     | 84<br>(43.8)  | 29<br>(15.1)            | 4.0<br>(1.0)                 |
| Community pharmacists are qualified to provide advice and an OTC therapy to treat common and minor symptoms in breastfeeding women                | 4<br>(2.1)                 | 25<br>(13.0)      | 38<br>(19.8)     | 90<br>(46.9)  | 35<br>(18.2)            | 4.0<br>(1.0)                 |
| Community pharmacists should recommend OTC therapy and counseling to treat common and minor symptoms in pregnant women                            | 14<br>(7.3)                | 49<br>(25.5)      | 54<br>(28.1)     | 55<br>(28.7)  | 20<br>(10.4)            | 3.0<br>(2.0)                 |
| Community pharmacists should recommend OTC therapy and counseling to treat common and minor symptoms in breastfeeding women                       | 13<br>(6.8)                | 40<br>(20.8)      | 49<br>(25.5)     | 72<br>(37.5)  | 18<br>(9.4)             | 3.0<br>(2.0)                 |
| <b>Overall Scale</b>                                                                                                                              |                            |                   |                  |               |                         | <b>4.0 (1.0)</b>             |
| <b>Safety of OTC medicine</b>                                                                                                                     |                            |                   |                  |               |                         |                              |
| OTC medicines are safe for pregnancy                                                                                                              | 29<br>(15.1)               | 70<br>(36.5)      | 52<br>(27.1)     | 34<br>(17.7)  | 7<br>(3.6)              | 2.0<br>(1.0)                 |
| OTC medicines are safe for breastfeeding                                                                                                          | 19<br>(9.9)                | 65<br>(33.9)      | 56<br>(29.1)     | 44<br>(22.9)  | 8<br>(4.2)              | 3.0<br>(2.0)                 |
| <b>Overall Scale</b>                                                                                                                              |                            |                   |                  |               |                         | <b>3.0 (1.0)</b>             |
| <b>Knowledge and confidence about pregnancy and breastfeeding</b>                                                                                 |                            |                   |                  |               |                         |                              |
| I am confident about giving advice and counselling to pregnant women                                                                              | 8<br>(4.2)                 | 27<br>(14.1)      | 45<br>(23.4)     | 97<br>(50.5)  | 15<br>(7.8)             | 4.0<br>(1.0)                 |
| I have sufficient knowledge to solve medication and health problems of pregnant women                                                             | 7<br>(3.6)                 | 19<br>(9.9)       | 48<br>(25.0)     | 95<br>(49.5)  | 23<br>(12.0)            | 3.0<br>(2.0)                 |
| I am confident about giving advice and counselling to breastfeeding women                                                                         | 11<br>(5.8)                | 25<br>(13.0)      | 54<br>(28.1)     | 83<br>(43.2)  | 19<br>(9.9)             | 4.0<br>(1.0)                 |
| I have sufficient knowledge to solve medication and health problems of breastfeeding women                                                        | 14<br>(7.2)                | 36<br>(18.8)      | 45<br>(23.4)     | 75<br>(39.1)  | 22<br>(11.5)            | 4.0<br>(1.0)                 |
| <b>Overall Scale</b>                                                                                                                              |                            |                   |                  |               |                         | <b>4..0 (1.0)</b>            |
| <b>Undergraduate Training</b>                                                                                                                     |                            |                   |                  |               |                         |                              |
| Pharmacy school provided appropriate training regarding advice and OTC therapy for pregnant women                                                 | 15<br>(7.8)                | 40<br>(20.8)      | 52<br>(27.1)     | 70<br>(36.5)  | 15<br>(7.8)             | 3.0<br>(2.0)                 |
| Pharmacy school provided appropriate training regarding advice and OTC therapy for breastfeeding women                                            | 16<br>(8.4)                | 40<br>(20.8)      | 55<br>(28.6)     | 65<br>(33.9)  | 16<br>(8.3)             | 3.0<br>(2.0)                 |
| <b>Overall Scale</b>                                                                                                                              |                            |                   |                  |               |                         | 3.0<br>(2.0)                 |

## Names of medications recommended by pharmacists for eight common symptoms in pregnancy and breastfeeding

| Common symptoms                                                                                                                                                                                                                                                                                                                                                                                                                                                                                                                                                                                                                                                                                                                                       | Frequency (%) of pharmacists recommended medicines for pregnant women | Frequency (%) of pharmacists recommended medicines for breastfeeding women |
|-------------------------------------------------------------------------------------------------------------------------------------------------------------------------------------------------------------------------------------------------------------------------------------------------------------------------------------------------------------------------------------------------------------------------------------------------------------------------------------------------------------------------------------------------------------------------------------------------------------------------------------------------------------------------------------------------------------------------------------------------------|-----------------------------------------------------------------------|----------------------------------------------------------------------------|
| <b>4 Headache</b>                                                                                                                                                                                                                                                                                                                                                                                                                                                                                                                                                                                                                                                                                                                                     | *n=154                                                                | *n=169                                                                     |
| 5 Paracetamol tablet                                                                                                                                                                                                                                                                                                                                                                                                                                                                                                                                                                                                                                                                                                                                  | 151 (98.1%)                                                           | 145 (85.8)                                                                 |
| 6 Ibuprofen tablet                                                                                                                                                                                                                                                                                                                                                                                                                                                                                                                                                                                                                                                                                                                                    | 3 (1.9%)                                                              | 24 (14.2)                                                                  |
| <b>7 Sore throat**</b>                                                                                                                                                                                                                                                                                                                                                                                                                                                                                                                                                                                                                                                                                                                                | *n= 106                                                               | *n=124                                                                     |
| 8 Lozenges                                                                                                                                                                                                                                                                                                                                                                                                                                                                                                                                                                                                                                                                                                                                            | 90 (84.9)                                                             | 89 (71.8)                                                                  |
| 9 Paracetamol tablet                                                                                                                                                                                                                                                                                                                                                                                                                                                                                                                                                                                                                                                                                                                                  | 16 (15.1)                                                             | 29 (23.4)                                                                  |
| 10 Vitamin C tablet                                                                                                                                                                                                                                                                                                                                                                                                                                                                                                                                                                                                                                                                                                                                   | 14 (13.2)                                                             | 16 (12.9)                                                                  |
| 11 Amoxicillin capsule                                                                                                                                                                                                                                                                                                                                                                                                                                                                                                                                                                                                                                                                                                                                | 4 (3.8)                                                               | 6 (4.8)                                                                    |
| 12 Azithromycin tablet                                                                                                                                                                                                                                                                                                                                                                                                                                                                                                                                                                                                                                                                                                                                | 2 (1.9)                                                               | 2 (1.6)                                                                    |
| <b>13 Runny nose**</b>                                                                                                                                                                                                                                                                                                                                                                                                                                                                                                                                                                                                                                                                                                                                | *n=113                                                                | *n=124                                                                     |
| 14 Normal saline spray                                                                                                                                                                                                                                                                                                                                                                                                                                                                                                                                                                                                                                                                                                                                | 69 (61.1)                                                             | 33 (26.6)                                                                  |
| 15 Loratadine tablet                                                                                                                                                                                                                                                                                                                                                                                                                                                                                                                                                                                                                                                                                                                                  | 17 (15.0)                                                             | 30 (24.2)                                                                  |
| 16 Paracetamol and Pseudoephedrine tablet                                                                                                                                                                                                                                                                                                                                                                                                                                                                                                                                                                                                                                                                                                             | 19 (16.8)                                                             | 22 (17.7)                                                                  |
| 17 Vitamin C tablet                                                                                                                                                                                                                                                                                                                                                                                                                                                                                                                                                                                                                                                                                                                                   | 21 (18.6)                                                             | 25 (20.2)                                                                  |
| 18 Vitamin C tablet                                                                                                                                                                                                                                                                                                                                                                                                                                                                                                                                                                                                                                                                                                                                   | 7 (6.2)                                                               | 17 (13.7)                                                                  |
| 19 Cetirizine tablet                                                                                                                                                                                                                                                                                                                                                                                                                                                                                                                                                                                                                                                                                                                                  | 2 (1.8)                                                               | 3 (1.6)                                                                    |
| 20 Corticosteroid nasal spray                                                                                                                                                                                                                                                                                                                                                                                                                                                                                                                                                                                                                                                                                                                         |                                                                       |                                                                            |
| <b>21 Dry cough</b>                                                                                                                                                                                                                                                                                                                                                                                                                                                                                                                                                                                                                                                                                                                                   | *n=110                                                                | *n=126                                                                     |
| 22 Prospan <sup>®</sup> syrup                                                                                                                                                                                                                                                                                                                                                                                                                                                                                                                                                                                                                                                                                                                         | 86 (78.2)                                                             | 75 (59.5)                                                                  |
| 23 Codilar <sup>®</sup> syrup                                                                                                                                                                                                                                                                                                                                                                                                                                                                                                                                                                                                                                                                                                                         | 12 (10.9)                                                             | 20 (15.9)                                                                  |
| 24 Cloperastine syrup                                                                                                                                                                                                                                                                                                                                                                                                                                                                                                                                                                                                                                                                                                                                 | 8 (7.3)                                                               | 22 (17.5)                                                                  |
| 25 Butamirate syrup                                                                                                                                                                                                                                                                                                                                                                                                                                                                                                                                                                                                                                                                                                                                   | 4 (3.6)                                                               | 9 (7.1)                                                                    |
| 26                                                                                                                                                                                                                                                                                                                                                                                                                                                                                                                                                                                                                                                                                                                                                    |                                                                       |                                                                            |
| <b>27 Productive cough**</b>                                                                                                                                                                                                                                                                                                                                                                                                                                                                                                                                                                                                                                                                                                                          | *n=129                                                                | *n=131                                                                     |
| 28 Prospan <sup>®</sup> syrup                                                                                                                                                                                                                                                                                                                                                                                                                                                                                                                                                                                                                                                                                                                         | 113 (87.6)                                                            | 85 (64.9)                                                                  |
| 29 Mucolytic syrup                                                                                                                                                                                                                                                                                                                                                                                                                                                                                                                                                                                                                                                                                                                                    | 15 (11.6)                                                             | 9 (6.9)                                                                    |
| 30 Amoxicillin capsule                                                                                                                                                                                                                                                                                                                                                                                                                                                                                                                                                                                                                                                                                                                                | 2 (1.6)                                                               | 2 (1.5)                                                                    |
| 31 Loratadine tablet                                                                                                                                                                                                                                                                                                                                                                                                                                                                                                                                                                                                                                                                                                                                  | 3 (2.3)                                                               | 24 (18.3)                                                                  |
| 32 Butamirate syrup                                                                                                                                                                                                                                                                                                                                                                                                                                                                                                                                                                                                                                                                                                                                   | -                                                                     | 10 (7.6)                                                                   |
| 33 Cloperastine syrup                                                                                                                                                                                                                                                                                                                                                                                                                                                                                                                                                                                                                                                                                                                                 | -                                                                     | 8 (6.1)                                                                    |
| <b>34 Constipation</b>                                                                                                                                                                                                                                                                                                                                                                                                                                                                                                                                                                                                                                                                                                                                | *n=138                                                                | *n=134                                                                     |
| 35 Sterculia granules                                                                                                                                                                                                                                                                                                                                                                                                                                                                                                                                                                                                                                                                                                                                 | 63 (45.7)                                                             | 43 (32.1)                                                                  |
| 36 Lactulose syrup                                                                                                                                                                                                                                                                                                                                                                                                                                                                                                                                                                                                                                                                                                                                    | 60 (43.5)                                                             | 63 (47.0)                                                                  |
| 37 Glycerine suppository                                                                                                                                                                                                                                                                                                                                                                                                                                                                                                                                                                                                                                                                                                                              | 6 (4.3)                                                               | 11 (8.2)                                                                   |
| 38 Sennalax <sup>®</sup> tablet <sup>®</sup>                                                                                                                                                                                                                                                                                                                                                                                                                                                                                                                                                                                                                                                                                                          | 9 (6.5)                                                               | 17 (12.7)                                                                  |
| <b>39 Diarrhea**</b>                                                                                                                                                                                                                                                                                                                                                                                                                                                                                                                                                                                                                                                                                                                                  | n=75                                                                  | n=90                                                                       |
| 40 Kaolin + Pectin syrup                                                                                                                                                                                                                                                                                                                                                                                                                                                                                                                                                                                                                                                                                                                              | 23 (30.7)                                                             | 18 (20.0)                                                                  |
| 41 Nifuroxazide tablet                                                                                                                                                                                                                                                                                                                                                                                                                                                                                                                                                                                                                                                                                                                                | 18 (24.0)                                                             | 32 (35.6)                                                                  |
| 42 Loperamide tablet                                                                                                                                                                                                                                                                                                                                                                                                                                                                                                                                                                                                                                                                                                                                  | 16 (21.3)                                                             | 26 (28.9)                                                                  |
| 43 Oral rehydration salts                                                                                                                                                                                                                                                                                                                                                                                                                                                                                                                                                                                                                                                                                                                             | 25 (33.3)                                                             | 21 (23.3)                                                                  |
| 44 Activated charcoal tablet                                                                                                                                                                                                                                                                                                                                                                                                                                                                                                                                                                                                                                                                                                                          | 3 (4.0)                                                               | -                                                                          |
| 45 Hyoscine tablet                                                                                                                                                                                                                                                                                                                                                                                                                                                                                                                                                                                                                                                                                                                                    | -                                                                     | 3 (3.3)                                                                    |
| <b>46 Hemorrhoids</b>                                                                                                                                                                                                                                                                                                                                                                                                                                                                                                                                                                                                                                                                                                                                 | n=84                                                                  | n=95                                                                       |
| 47 Neo-healar <sup>®</sup> cream                                                                                                                                                                                                                                                                                                                                                                                                                                                                                                                                                                                                                                                                                                                      | 35 (41.6)                                                             | 25 (26.3)                                                                  |
| 48 Pilex <sup>®</sup> ointment <sup>®</sup>                                                                                                                                                                                                                                                                                                                                                                                                                                                                                                                                                                                                                                                                                                           | 24 (28.6)                                                             | 17 (17.9)                                                                  |
| 49 Procto-Glyvenol <sup>®</sup> cream                                                                                                                                                                                                                                                                                                                                                                                                                                                                                                                                                                                                                                                                                                                 | 15 (17.9)                                                             | 24 (25.3)                                                                  |
| 50 Procto-Glyvenol <sup>®</sup> suppository                                                                                                                                                                                                                                                                                                                                                                                                                                                                                                                                                                                                                                                                                                           | 10 (11.9)                                                             | 15 (15.8)                                                                  |
| 51 Daflon <sup>®</sup> tablet                                                                                                                                                                                                                                                                                                                                                                                                                                                                                                                                                                                                                                                                                                                         | -                                                                     | 2 (2.1)                                                                    |
| 52 Proctosedyl <sup>®</sup> suppository                                                                                                                                                                                                                                                                                                                                                                                                                                                                                                                                                                                                                                                                                                               | -                                                                     | 12 (12.6)                                                                  |
| 53 *Number of pharmacists recommended dispensation of a medicine; ** May total > 100% because of recommended combination of medicines; Prospan <sup>®</sup> (herbal medicinal product containing ivy leaf extract); Codilar <sup>®</sup> (Chlorpheniramine + Dextromethorphan + Phenylephrine); Sennalax <sup>®</sup> (Sennosides + docusate); Neo-healar <sup>®</sup> (four medicinal plants: Lupinus Albus, Vateria Indica, Mentha Piperita, Aloe Vera); Pilex <sup>®</sup> (a mixture of herbs [Mimosa pudica, thistles, Vitex negundo, Calendula flowers, camphor], Zinc, and Borax); Procto-Glyvenol <sup>®</sup> (tribenosid + lidocaine); Daflon <sup>®</sup> (diosmin + hesperidin); Proctosedyl <sup>®</sup> (hydrocortisone + cinchocaine). |                                                                       |                                                                            |

| <b>Names of medications recommended by respondents for specific symptoms in pregnancy</b> |                                                           |
|-------------------------------------------------------------------------------------------|-----------------------------------------------------------|
| <b>Specific pregnancy symptoms</b>                                                        | <b>Frequency (%) of pharmacists recommended medicines</b> |
| <b>Nausea and vomiting</b>                                                                | *n=139                                                    |
| Navidoxine® tablet                                                                        | 110 (79.1)                                                |
| Ondasetron tablet                                                                         | 27 (19.4)                                                 |
| Domperidone tablet                                                                        | 1 (0.7)                                                   |
| Multivitamin capsule                                                                      | 1 (0.7)                                                   |
| <b>Indigestion (heartburn)</b>                                                            | *n=131                                                    |
| Gaviscon® suspension                                                                      | 89 (67.9)                                                 |
| Ranitidine tablet                                                                         | 20 (15.3)                                                 |
| Zymogen® tablet                                                                           | 22 (16.8)                                                 |
| <b>Back pain**</b>                                                                        | *n=92                                                     |
| Paracetamol tablet                                                                        | 42 (45.7)                                                 |
| Diclofenac gel                                                                            | 27 (29.3)                                                 |
| Reparil® gel                                                                              | 7 (7.6)                                                   |
| Relaxnova® cream                                                                          | 21 (22.8)                                                 |
| <b>Insomnia</b>                                                                           | *n=20                                                     |
| St John's wort®                                                                           | 5 (25.0)                                                  |
| Dream water®                                                                              | 10 (50.0)                                                 |
| Melatonin tablet                                                                          | 5 (25.0)                                                  |
| <b>Fever and aches</b>                                                                    | *n=93                                                     |
| Paracetamol tablet                                                                        | 93 (100)                                                  |
| <b>Vaginal itching and simple discharge</b>                                               | *n=67                                                     |
| Clotrimazole ovule                                                                        | 20 (29.9)                                                 |
| Clotrimazole cream                                                                        | 15 (22.4)                                                 |
| Clotrimazole wash                                                                         | 9 (13.4)                                                  |
| Miconazole cream                                                                          | 11 (16.4)                                                 |
| Miconazole ovule                                                                          | 12 (17.9)                                                 |
| <b>Varicose veins</b>                                                                     | *n=28                                                     |
| Venoruton® gel                                                                            | 21 (75.0)                                                 |
| Reparil® gel                                                                              | 7 (25.0)                                                  |
| <b>Swelling feet and legs</b>                                                             | *n=15                                                     |
| Reparil® gel                                                                              | 11 (73.3)                                                 |
| Varixinal® gel                                                                            | 4 (26.7)                                                  |

\*Number of pharmacists recommended dispensation of a medicine; \*\* May total > 100% because of recommended combination of medicines; Zymogen® (Lipase + Proteas +Pepsin + Hemicellulase +Ox bile extract +Dimethylpolysiloxane +Vitamin B1); Reparil® (Aescinum +Diethylamini salicylas); Relaxnova® (Idrocilamide) ; St John's Wort® (Hypericum perforatum); Dream water® (Melatonin + 5-HTP + GABA); Venorutin® (Rutoside); Varixinal® (Ruscus Aculeatus Extract, Aesculus Hippocastanum Extract, Centella Asiatica Extract, Vaccinium Myrtillus Extract).



STROBE Statement—checklist of items that should be included in reports of observational studies

|                              | Item No | Recommendation                                                                                                                                                                                                                                                                                                                                                                                                                                                                                                                                                                                                                                                                                                                                   |
|------------------------------|---------|--------------------------------------------------------------------------------------------------------------------------------------------------------------------------------------------------------------------------------------------------------------------------------------------------------------------------------------------------------------------------------------------------------------------------------------------------------------------------------------------------------------------------------------------------------------------------------------------------------------------------------------------------------------------------------------------------------------------------------------------------|
| <b>Title and abstract</b>    | 1       | (a) Indicate the study's design with a commonly used term in the title or the abstract <b>Pages 1 and 2 (paragraph 2) of the manuscript.</b><br>(b) Provide in the abstract an informative and balanced summary of what was done and what was found <b>Pages 2 and 3 (paragraph 1) of the manuscript.</b>                                                                                                                                                                                                                                                                                                                                                                                                                                        |
| <b>Introduction</b>          |         |                                                                                                                                                                                                                                                                                                                                                                                                                                                                                                                                                                                                                                                                                                                                                  |
| Background/rationale         | 2       | Explain the scientific background. <b>Pages 4 and 5 (paragraph 1) of the manuscript.</b> and rationale for the investigation being reported. <b>Page 5 (paragraph 2) of the manuscript.</b>                                                                                                                                                                                                                                                                                                                                                                                                                                                                                                                                                      |
| Objectives                   | 3       | State specific objectives, including any prespecified hypotheses. <b>Page 5 (paragraph 2) and page 6 (paragraph 1) of the manuscript.</b>                                                                                                                                                                                                                                                                                                                                                                                                                                                                                                                                                                                                        |
| <b>Methods</b>               |         |                                                                                                                                                                                                                                                                                                                                                                                                                                                                                                                                                                                                                                                                                                                                                  |
| Study design                 | 4       | Present key elements of study design early in the paper. <b>Page 6 (paragraph 2) of the manuscript.</b>                                                                                                                                                                                                                                                                                                                                                                                                                                                                                                                                                                                                                                          |
| Setting                      | 5       | Describe the setting, locations, and relevant dates, including periods of recruitment, exposure, follow-up, and data collection. <b>Page 6 (paragraph 2) of the manuscript.</b>                                                                                                                                                                                                                                                                                                                                                                                                                                                                                                                                                                  |
| Participants                 | 6       | (a) <i>Cohort study</i> —Give the eligibility criteria, and the sources and methods of selection of participants. Describe methods of follow-up<br><i>Case-control study</i> —Give the eligibility criteria, and the sources and methods of case ascertainment and control selection. Give the rationale for the choice of cases and controls<br><i>Cross-sectional study</i> —Give the eligibility criteria, and the sources and methods of selection of participants. <b>Page 6 (paragraph 3) of the manuscript.</b><br>(b) <i>Cohort study</i> —For matched studies, give matching criteria and number of exposed and unexposed<br><i>Case-control study</i> —For matched studies, give matching criteria and the number of controls per case |
| Variables                    | 7       | Clearly define all outcomes, exposures, predictors, potential confounders, and effect modifiers. Give diagnostic criteria, if applicable. <b>Pages 7 and 8 (paragraph 1) of the manuscript.</b>                                                                                                                                                                                                                                                                                                                                                                                                                                                                                                                                                  |
| Data sources/<br>measurement | 8*      | For each variable of interest, give sources of data and details of methods of assessment (measurement). Describe comparability of assessment methods if there is more than one group. <b>Pages 7 and 8 (paragraph 1) of the manuscript.</b>                                                                                                                                                                                                                                                                                                                                                                                                                                                                                                      |
| Bias                         | 9       | Describe any efforts to address potential sources of bias. <b>Page 3 of the manuscript.</b>                                                                                                                                                                                                                                                                                                                                                                                                                                                                                                                                                                                                                                                      |
| Study size                   | 10      | Explain how the study size was arrived at. <b>Page 6 (paragraph 2) of the manuscript.</b>                                                                                                                                                                                                                                                                                                                                                                                                                                                                                                                                                                                                                                                        |
| Quantitative variables       | 11      | Explain how quantitative variables were handled in the analyses. If applicable, describe which groupings were chosen and why. <b>Page 8 (paragraphs 2 and 3) of the manuscript.</b>                                                                                                                                                                                                                                                                                                                                                                                                                                                                                                                                                              |
| Statistical methods          | 12      | (a) Describe all statistical methods, including those used to control for confounding<br>(b) Describe any methods used to examine subgroups and interactions<br>(c) Explain how missing data were addressed<br>(d) <i>Cohort study</i> —If applicable, explain how loss to follow-up was addressed<br><i>Case-control study</i> —If applicable, explain how matching of cases and controls was                                                                                                                                                                                                                                                                                                                                                   |

1  
2 addressed

3 *Cross-sectional study*—If applicable, describe analytical methods taking account of  
4 sampling strategy. **Page 8 (paragraphs 2 and 3) of the manuscript.**

---

5 (e) Describe any sensitivity analyses  
6

7 Continued on next page  
8  
9  
10  
11  
12  
13  
14  
15  
16  
17  
18  
19  
20  
21  
22  
23  
24  
25  
26  
27  
28  
29  
30  
31  
32  
33  
34  
35  
36  
37  
38  
39  
40  
41  
42  
43  
44  
45  
46  
47  
48  
49  
50  
51  
52  
53  
54  
55  
56  
57  
58  
59  
60

For peer review only

**Results**

|                  |     |                                                                                                                                                                                                                                                                                                                                                                                                                                                                                                                                                                                      |
|------------------|-----|--------------------------------------------------------------------------------------------------------------------------------------------------------------------------------------------------------------------------------------------------------------------------------------------------------------------------------------------------------------------------------------------------------------------------------------------------------------------------------------------------------------------------------------------------------------------------------------|
| Participants     | 13* | (a) Report numbers of individuals at each stage of study—eg numbers potentially eligible, examined for eligibility, confirmed eligible, included in the study, completing follow-up, and analysed. <b>Page 9 (paragraph 1) of the manuscript and Table 1 (page 21).</b><br>(b) Give reasons for non-participation at each stage<br>(c) Consider use of a flow diagram                                                                                                                                                                                                                |
| Descriptive data | 14* | (a) Give characteristics of study participants (eg demographic, clinical, social) and information on exposures and potential confounders. <b>Page 9 (paragraph 1) of the manuscript and Table 1 (page 21)</b><br>(b) Indicate number of participants with missing data for each variable of interest <b>There were no missing data for variables of interest since the questionnaires were checked for being completed at the stage of their collection in hand from the study participants.</b><br>(c) <i>Cohort study</i> —Summarise follow-up time (eg, average and total amount) |
| Outcome data     | 15* | <i>Cohort study</i> —Report numbers of outcome events or summary measures over time<br><i>Case-control study</i> —Report numbers in each exposure category, or summary measures of exposure<br><i>Cross-sectional study</i> —Report numbers of outcome events or summary measures <b>Pages 9 to 12 of the manuscript + Table 1 (page 21), Figures 1, 2 and 3 (pages 22-24) and table 2 (page 25) + Supplementary file</b>                                                                                                                                                            |
| Main results     | 16  | (a) Give unadjusted estimates and, if applicable, confounder-adjusted estimates and their precision (eg, 95% confidence interval). Make clear which confounders were adjusted for and why they were included<br>(b) Report category boundaries when continuous variables were categorized <b>Pages 9 to 12 of the manuscript</b><br>(c) If relevant, consider translating estimates of relative risk into absolute risk for a meaningful time period                                                                                                                                 |
| Other analyses   | 17  | Report other analyses done—eg analyses of subgroups and interactions, and sensitivity analyses <b>Page 8 (paragraph 2) of the manuscript</b>                                                                                                                                                                                                                                                                                                                                                                                                                                         |

**Discussion**

|                  |    |                                                                                                                                                                                                                                  |
|------------------|----|----------------------------------------------------------------------------------------------------------------------------------------------------------------------------------------------------------------------------------|
| Key results      | 18 | Summarise key results with reference to study objectives <b>Page 13 (paragraph 1) of the manuscript</b>                                                                                                                          |
| Limitations      | 19 | Discuss limitations of the study, taking into account sources of potential bias or imprecision. Discuss both direction and magnitude of any potential bias. <b>Page 3 of the manuscript</b>                                      |
| Interpretation   | 20 | Give a cautious overall interpretation of results considering objectives, limitations, multiplicity of analyses, results from similar studies, and other relevant evidence <b>Pages 13 to 16 (paragraph 2) of the manuscript</b> |
| Generalisability | 21 | Discuss the generalisability (external validity) of the study results <b>Page 3 of the manuscript</b>                                                                                                                            |

**Other information**

|         |    |                                                                                                                                                                                               |
|---------|----|-----------------------------------------------------------------------------------------------------------------------------------------------------------------------------------------------|
| Funding | 22 | Give the source of funding and the role of the funders for the present study and, if applicable, for the original study on which the present article is based <b>Page 1 of the manuscript</b> |
|---------|----|-----------------------------------------------------------------------------------------------------------------------------------------------------------------------------------------------|

\*Give information separately for cases and controls in case-control studies and, if applicable, for exposed and unexposed groups in cohort and cross-sectional studies.

**Note:** An Explanation and Elaboration article discusses each checklist item and gives methodological background and published examples of transparent reporting. The STROBE checklist is best used in conjunction with this article (freely

1  
2 available on the Web sites of PLoS Medicine at <http://www.plosmedicine.org/>, Annals of Internal Medicine at  
3 <http://www.annals.org/>, and Epidemiology at <http://www.epidem.com/>). Information on the STROBE Initiative is  
4 available at [www.strobe-statement.org](http://www.strobe-statement.org).  
5  
6  
7  
8  
9  
10  
11  
12  
13  
14  
15  
16  
17  
18  
19  
20  
21  
22  
23  
24  
25  
26  
27  
28  
29  
30  
31  
32  
33  
34  
35  
36  
37  
38  
39  
40  
41  
42  
43  
44  
45  
46  
47  
48  
49  
50  
51  
52  
53  
54  
55  
56  
57  
58  
59  
60

For peer review only

# BMJ Open

## Community pharmacists' services for women during pregnancy and breastfeeding in Kuwait: A cross-sectional study

|                                 |                                                                                                                                                                  |
|---------------------------------|------------------------------------------------------------------------------------------------------------------------------------------------------------------|
| Journal:                        | <i>BMJ Open</i>                                                                                                                                                  |
| Manuscript ID                   | bmjopen-2017-018980.R1                                                                                                                                           |
| Article Type:                   | Research                                                                                                                                                         |
| Date Submitted by the Author:   | 26-Sep-2017                                                                                                                                                      |
| Complete List of Authors:       | Albassam, Abdullah ; Kuwait University - Faculty of Pharmacy, Pharmacy Practice<br>Awad, Abdelmoneim; Kuwait University - Faculty of Pharmacy, Pharmacy Practice |
| <b>Primary Subject Heading</b>: | Public health                                                                                                                                                    |
| Secondary Subject Heading:      | Health services research                                                                                                                                         |
| Keywords:                       | Community pharmacists, pregnancy, breastfeeding, self-care, self-medication, Kuwait                                                                              |
|                                 |                                                                                                                                                                  |

SCHOLARONE™  
Manuscripts

1 **Title: Community pharmacists' services for women during pregnancy and breastfeeding in**  
2 **Kuwait: A cross-sectional study**

3  
4 **Authors Information:**

5  
6  
7 **1. Abdullah Albassam, PhD**

8  
9 Assistant Professor  
10 Department of Pharmacy Practice, Faculty of Pharmacy, Kuwait University  
11 E-mail: [albassam@hsc.edu.kw](mailto:albassam@hsc.edu.kw)  
12

13  
14 **2. Abdelmoneim Awad, PhD – Corresponding Author**

15  
16 Professor  
17 Department of Pharmacy Practice, Faculty of Pharmacy, Kuwait University, Kuwait  
18 E-mail: [amoneim@hsc.edu.kw](mailto:amoneim@hsc.edu.kw)  
19 Tel: +965-24636914  
20 Fax: +965-24636840  
21 ORCID:0000-0002-2266-3687  
22  
23  
24  
25  
26

27 **Sources of support:** This research received no specific grant from any funding agency in the  
28 public, commercial or not-for-profit sectors.  
29  
30

31 **Word count for the paper's text:** 3594

32  
33 **Word count for abstract:** 300

34  
35 **Number of figures:** 3

36  
37 **Number of tables:** 2

38  
39 **Conflict of Interest declaration:** We have read and understood the BMJ policy on declaration of  
40 interests and declare that we have no competing interests with regard to the data produced  
41  
42  
43  
44  
45  
46  
47  
48  
49  
50  
51  
52  
53  
54  
55  
56  
57  
58  
59  
60

## ABSTRACT

**Objectives:** This study was designed to identify the services provided by community pharmacists in Kuwait and their views regarding self-care in pregnancy and lactation. In addition, it determined the pharmacists' recommendations for treatment of pregnancy and breastfeeding related ailments.

**Design:** Cross-sectional questionnaire-based survey.

**Setting:** Community pharmacies in Kuwait.

**Participants:** 207 pharmacies were randomly selected from the Ministry of Health database. One registered pharmacist was approached from each pharmacy. One hundred and ninety-two (92.8%) pharmacists agreed to participate and completed a self-administered questionnaire.

**Outcomes:** The proportions of pharmacists offering particular advice for health conditions in pregnancy and lactation, pharmacists' recommendations for common and specific ailments during pregnancy and breastfeeding, and pharmacists' views about self-care in pregnancy and breastfeeding.

**Results:** The top services provided to pregnant and lactating women were recommending vitamins and food supplements (89.8%) and contraception advice (83.4%), respectively. More than half of participants indicated that they would recommend medications for headache, constipation, cough, runny nose, sore throat, nausea/vomiting, indigestion, sore or cracked nipple and insufficient milk. Diarrhea, hemorrhoids, insomnia, varicose vein, swelling of the feet and legs, vaginal itching, back pain, fever, mastitis and engorgement were frequently referred to the physician. Recommendations on medication use were occasionally inappropriate in terms of unneeded drug therapy, off-label use, and safety. In relation to offering advice and solving medication and health problems of pregnant and lactating women, more than half of pharmacists indicated that they have sufficient knowledge (61.5%; 50.5%) and confidence (58.3%; 53.1%), respectively. Most of the respondents (88.5%) agreed that a continuing education program on this topic would be of value for their practice.

1 **Conclusion** The present findings show that respondents had different recommendations for  
2  
3 treatment of pregnancy and lactation related ailments; and also highlight the need for interventions,  
4  
5 including continuing professional development and revision of the undergraduate pharmacy  
6  
7 curriculum.  
8  
9

10  
11  
12 **Keywords:** Community pharmacists, pregnancy, breastfeeding, lactation, feto-maternal self-care,  
13  
14 self-medication, Kuwait  
15  
16

### 17 18 19 **Strengths and limitations of this study**

- 20  
21  
22 ➤ The strength of this survey included the high response rate, which could indicate the importance  
23  
24 of this topic to community pharmacists and the length of time that they were willing to spend on  
25  
26 completing the questionnaire.  
27  
28  
29 ➤ Further strength was the adequate sample size and sampling method to produce a representative  
30  
31 data regarding the study population; therefore, the present findings can be generalized at the  
32  
33 community pharmacists level in Kuwait.  
34  
35  
36 ➤ In addition, this study fills in a gap in the limited existing literature in the developing countries  
37  
38 and provides useful pieces of information for community pharmacists' services for pregnant and  
39  
40 lactating women in the Middle Eastern region.  
41  
42  
43 ➤ Limitations of this study include that the survey did not truly assess real-life situations;  
44  
45 therefore, the extent of being definitely sure that respondents perform what they declare is not  
46  
47 possible and open to recall bias or error.  
48  
49  
50 ➤ Further limitation is the social desirability bias that the respondents might have offered favorable  
51  
52 answers to conform to the more socially accepted view.  
53  
54  
55  
56  
57  
58  
59  
60

## INTRODUCTION

Self-care is defined as “*the action individuals take for themselves and their families to stay healthy and take care of minor and long term conditions, based on their knowledge and the information available, and working in collaboration with health and social care professionals where necessary*”.<sup>1</sup> Self-medication is a part of self-care behaviors, which is mainly considered in developed countries for minor illnesses by using over-the-counter (OTC) medications, while in developing countries is for both minor and major illnesses as a wider spectrum of medications is available from community pharmacies without a prescription.<sup>2</sup>

The prevalence of self-medication throughout pregnancy was found to be in the range between 25% and 68%.<sup>3-7</sup> The most commonly used OTC medications were analgesics, cough and common cold remedies, allergy products, laxatives, antacids, vitamins, antibiotics and herbal products.<sup>4 6 8</sup> The rates of self-medication among breastfeeding women ranged between 17% and 52%.<sup>9 10</sup> The most used OTC medicines were analgesics, antispasmodics, laxatives, and nasal decongestants.<sup>9</sup> The effect of medication use during pregnancy and lactation is a major worry for both women and healthcare practitioners.<sup>11</sup> Hence, there is a need for professional guidance for selection of appropriate and safe OTC medicines for each ailment.

In 2011, the International Pharmaceutical Federation (FIP) Council approved a document on the valuable pharmacists' roles to improve maternal, newborn, and child health. These roles have been structured in accordance with the FIP/WHO (World Health Organization) Guidelines on Good Pharmacy Practice.<sup>12</sup>

1 Previous studies have evaluated the role of community pharmacists in providing advice or  
2  
3 counselling regarding pregnancy and lactation related ailments. in the USA, France, the  
4  
5 Netherlands, Canada, Iceland, Serbia, Norway, Thailand, Uganda and Qatar.<sup>13-18</sup> The main findings  
6  
7 of these studies included a variation in community pharmacists' responses for treatment of common  
8  
9 ailments during pregnancy and breastfeeding, the recommendations of unsafe medications during  
10  
11 pregnancy and lactation, and the different levels of pharmacists' knowledge in the area of maternal-  
12  
13 fetal medicine.  
14  
15

16  
17  
18  
19  
20 Additional studies regarding community pharmacists' services for pregnant and lactating women  
21  
22 still need to be performed, particularly in developing countries where most of medications can be  
23  
24 obtained from the pharmacy without prescription. To our knowledge, only one study has explored  
25  
26 the pharmacists' knowledge and perceptions of maternal-fetal medicine in the Eastern  
27  
28 Mediterranean region in Qatar.<sup>18</sup> Hence, this study was designed to identify the services provided  
29  
30 by community pharmacists regarding self-care in pregnancy and lactation, determine the  
31  
32 pharmacists' recommendations (services) for treatment of pregnancy and lactation related ailments,  
33  
34 and identify their views about self-care during pregnancy and lactation. Secondary objectives were  
35  
36 to determine factors associated with pharmacists' (a) recommendations for treatment of pregnancy  
37  
38 and lactation related ailments, (b) views about self-care of pregnant and breastfeeding women, and  
39  
40 (c) need for continuing education.  
41  
42  
43  
44  
45  
46  
47

## 48 **METHODS**

49  
50 The study design was a cross-sectional questionnaire-based survey. It was performed in Kuwait, a  
51  
52 Middle-Eastern country with an area of 17,820 km<sup>2</sup> and an approximate population of 3,065,850  
53  
54 individuals (2011 estimate).<sup>19</sup> It was conducted during the period from March to December 2015.  
55  
56  
57  
58  
59  
60

1 The study population comprised of employed community pharmacists in Kuwait. Ethical approval  
2  
3 (No. 1593) was received from the “Ministry of Health Ethical Committee, Kuwait” on 02/12/2014  
4  
5 PS power and sample size calculator V.3.05 was used to determine the sample size.<sup>20</sup> One hundred  
6  
7 and eight six pharmacists would be needed to determine a 20% difference in proportion between  
8  
9 two groups (e.g., male vs. female) with an 80% power and a 5% significance level. Presuming a  
10  
11 response rate of 90%, a sample size of 207 community pharmacies were randomly selected from the  
12  
13 six governorates using stratified and systematic random sampling.<sup>21</sup> Due to the lack of lists with the  
14  
15 names and addresses of community pharmacists in Kuwait, lists of community pharmacies at the  
16  
17 various governorates were acquired from the Ministry of Health. The lists included a total of 348  
18  
19 pharmacies distributed across the six governorates of Kuwait. Only one full-licensed pharmacist  
20  
21 was approached from pharmacies hiring more than one pharmacist. The aim of the survey was  
22  
23 concisely explained to the pharmacist on duty (face-to face). Pharmacists were free to refuse to take  
24  
25 part in the study. Those who agreed to participate in the survey were handed the questionnaires and  
26  
27 then were gathered from them anonymously after being completed within one to two weeks. They  
28  
29 signed a consent form to participate in the study.  
30  
31  
32  
33  
34  
35  
36  
37  
38

39 The study survey was adapted from validated questionnaires that were previously used in Thailand  
40  
41 and France.<sup>14 16</sup> A research group at Kuwait University established the content validity of the  
42  
43 adapted survey. Its face validity was assessed with 5 community pharmacists for clarity of  
44  
45 questions. Then the survey was pretested on 10 community pharmacists, and refinements were  
46  
47 made as needed so that the survey was simple to comprehend and answer.  
48  
49  
50  
51  
52

53 The pre-tested survey contained four sections (Appendix-1). Demographic and other characteristics  
54  
55 of respondents were included in the first section . Section two contained eleven questions to provide  
56  
57 information about the services provided by the community pharmacists regarding self-care in  
58  
59  
60

1 pregnancy and lactation. These questions were about the availability of information leaflet or  
2  
3 brochure to promote health for pregnant and breastfeeding women, experience in providing services  
4  
5 for pregnant and breastfeeding women, number of pregnant and breastfeeding women who visited  
6  
7 the pharmacy per week, the three services most commonly provided for pregnant and breastfeeding  
8  
9 women, the two symptoms and/or questions that both pregnant and breastfeeding women most  
10  
11 frequently consulted the pharmacists in the past, and how do they know that women are pregnant or  
12  
13 breastfeeding. Seven of the above questions were close-ended. . The third section included 16  
14  
15 common symptoms in pregnancy and 12 common symptoms in breastfeeding for which pregnant  
16  
17 and breastfeeding women often seek advice from pharmacists. They were asked to indicate the  
18  
19 recommendations (services) that they will provide for each symptom if being consulted by a  
20  
21 pregnant or breastfeeding women. They were needed to select from three options for each ailment  
22  
23 as they would be in real life situations: refer to a doctor, dispense medicine, and provide only advice  
24  
25 without dispensing medicine. If they decided to dispense medications, they were asked to indicate  
26  
27 the names of the medications. . The final section included twelve statements to identify the  
28  
29 pharmacists' views about self-care in pregnancy and breastfeeding. The responses were measured  
30  
31 using a 5-point Likert scale (strongly disagree, disagree, neither agree nor disagree (neutral), agree,  
32  
33 and strongly agree). In addition to three questions to determine the pharmacists need for continuing  
34  
35 education about self-care in pregnancy and breastfeeding, the convenient method of delivering the  
36  
37 continuing education for them, and the most common source of information used by them to  
38  
39 prepare themselves for responding to symptoms during pregnancy and lactation were asked  
40  
41  
42  
43  
44  
45  
46  
47  
48  
49

50 Data analysis was conducted using the Statistical Package for Social Sciences (IBM SPSS Statistics  
51  
52 for Windows, version 23, Armonk, NY: IBM Corp) . Pharmacists' responses were presented as  
53  
54 percentages (95% confidence intervals; CI) and medians (interquartile ranges; IQR). To simplify the  
55  
56 results' presentation in the text, those who answered "strongly agree" or "agree" were classified as  
57  
58  
59  
60

1 “agreed”, and those who answered “strongly disagree” or “disagree” as having disagreed. The  
2  
3 internal consistency for the sections to determine the pharmacists’ views about self-care in  
4  
5 pregnancy and breastfeeding was assessed using Cronbach’s  $\alpha$  test.  
6  
7  
8  
9

10 The univariate logistic regression was used first to evaluate the association of respondents’  
11  
12 characteristics with the dependent variables. All variables with  $p < 0.25$  in the univariate analysis  
13  
14 were included in the multivariate logistic regression analysis to determine the factors that are  
15  
16 independently associated with each of the dependent variables. Only the results of multivariate  
17  
18 logistic analysis are reported showing odds ratio (OR) and 95% CI. Statistical significance was  
19  
20 accepted at  $p < 0.05$ .  
21  
22  
23  
24  
25  
26

## 27 RESULTS

28  
29 One hundred and ninety-two (92.8%) pharmacists agreed to participate in the study. Their median  
30  
31 (IQR) age and experience as practitioners were 35 (11) years and 11 (7) years, respectively. Table  
32  
33 (1) shows the respondents’ characteristics.  
34  
35  
36  
37  
38

39 Above two-fifths ( $n=85$ ; 44.3%; 95% CI: 37.2- 51.6) of participants have information leaflets or  
40  
41 brochures to promote health for pregnancy and lactation, and most of these were from  
42  
43 pharmaceutical companies (66%). Most of the respondents had experience in providing services for  
44  
45 pregnant ( $n =186$ ; 96.9%; 95% CI: 93.0-98.7) and breastfeeding ( $n=181$ ; 94.3%; 95% CI: 89.7-  
46  
47 97.0) women. The median (IQR) numbers of pregnant women and breastfeeding women who  
48  
49 visited the community pharmacy per week were 10 (7) and 6 (3), respectively.  
50  
51  
52  
53  
54

55 Community pharmacists who reported to have experience in providing services for pregnant and  
56  
57 breastfeeding women were asked to indicate the most frequently provided services. The top three  
58  
59  
60

1 services provided for pregnant women were recommending vitamins and food supplements (n=167;  
2 89.8%; 95% CI: 84.3-93.6), referral to a doctor (n=126; 67.7%; 95% CI: 60.5-74.3), and providing  
3 advice about suitable behavior such as lifestyle and exercise (n=115; 61.8%; 95% CI: 54.4-68.8).  
4  
5 Other offered services, but to a lesser extent, were diagnosis of symptoms and dispensing of  
6 medicines (n=100; 53.8%; 95% CI: 46.3-61.0) and herbal products (n=80; 43.0%; 95% CI: 35.9-  
7 50.5). The three services most frequently provided for breastfeeding women were contraception  
8 advice (n=151; 83.4%; 95% CI: 77.0-88.4), recommending vitamins and food supplements (n=101;  
9 55.8%; 95% CI: 48.3-63.1), and weight control advice (n=92; 50.8%; 95% CI: 43.3-58.3). The other  
10 offered services, but to a lesser extent, were diagnosis of symptoms and dispensing of herbal  
11 products (n=88; 48.6%; 95% CI: 41.2-56.1) and medicines (n=69; 38.1%; 95% CI: 31.1- 45.7), and  
12 referral to a doctor (n=58; 32.0%; 95% CI: 25.4-39.4). About three-fifths (n=106; 58.6%; 95% CI:  
13 51.0-65.8) of respondents stated that they knew women are pregnant or breastfeeding by asking  
14 them, while 41.4% (n=75; 95% CI: 34.3-49.0) reported that women inform them before asking  
15 about the services.  
16  
17  
18  
19  
20  
21  
22  
23  
24  
25  
26  
27  
28  
29  
30  
31  
32

33  
34  
35  
36 Moreover, respondents indicated that they were most often consulted by pregnant women regarding  
37 gastrointestinal symptoms (nausea/vomiting, constipation, and stomach cramp), respiratory  
38 symptoms (common cold and cough), safety of medication use , and back pain. Breastfeeding  
39 women most frequently consulted them about a medicine to increase breast milk, contraceptive  
40 pills, safety of medication use , and respiratory symptoms (common cold and cough).  
41  
42  
43  
44  
45  
46  
47  
48  
49

50 Figure (1) presents the distribution of pharmacists' responses to the most commonly treated  
51 symptoms during pregnancy and breastfeeding. Most of the pharmacists recommended medicines or  
52 referral to a doctor rather than providing advice only without dispensing medicine for treatment of  
53 these symptoms. More than half of participants recommended medications for treatment of  
54  
55  
56  
57  
58  
59  
60

1 headache, constipation, cough, sore throat, and runny nose. In relation to diarrhea and hemorrhoids,  
2  
3 about three-fifths and half of respondents recommended referral to a doctor rather than dispensing  
4  
5 medicines or providing only advice, respectively. There were significant associations between the  
6  
7 recommendation to dispense medicines for treatment of diarrhea or constipation in breastfeeding  
8  
9 women and the respondents' experience as practitioners ( $p < 0.05$ ). It was found to be more common  
10  
11 among those with experience of  $> 10$  years compared to those with experience of  $< 10$  years (for  
12  
13 diarrhea:  $p = 0.02$ ; OR = 2.0; 95% CI: 1.1-3.5) and (for constipation:  $p = 0.02$ ; OR = 2.2; 95% CI: 1.1-  
14  
15 4.2).  
16  
17  
18  
19

20  
21  
22 Figure (2) presents the distribution of pharmacists' responses to the specific symptoms in  
23  
24 pregnancy. Over half of respondents recommended referral of pregnant women to the doctor for  
25  
26 swelling of the feet and legs, varicose vein, insomnia, vaginal itching, back pain, and fever and  
27  
28 aches. More than two-thirds of participants recommended dispensing of medications for treatment  
29  
30 of nausea, vomiting, and indigestion. There was a significant association between the  
31  
32 recommendation to dispense medicines for nausea/vomiting and the pharmacists' experience as  
33  
34 practitioners ( $p < 0.05$ ). It was found to be more common among those with experience of  $> 10$   
35  
36 years compared to those with experience of  $< 10$  years ( $p = 0.03$ ; OR = 2.6; 95% CI: 1.1-6.5). The  
37  
38 recommendation to dispense medicines for treatment of vaginal itching was significantly more  
39  
40 common among females compared to males ( $p = 0.01$ ; OR = 2.3; 95% CI: 1.2-4.4).  
41  
42  
43  
44  
45  
46  
47

48  
49 Figure (3) presents the distribution of pharmacists' responses to the specific symptoms in  
50  
51 breastfeeding women. Pharmacists mainly recommended dispensing of medications for sore or  
52  
53 cracked nipple and to increase the breast milk, and referral to the doctor for mastitis. There were  
54  
55 significant associations between the recommendation to dispense medicine to relieve engorgement  
56  
57 or increase the breast milk and gender. It was found to be more prevalent among females compared  
58  
59  
60

1 to males (for engorgement:  $p=0.01$ ; OR = 2.2; 95% CI: 1.1-4.1) and (for insufficient milk:  $p=0.03$ ;  
2  
3 OR = 2.5; 95% CI: 1.1-5.9).  
4  
5  
6  
7

8 The medications that respondents recommended for each of the symptoms during pregnancy and  
9 breastfeeding are presented in the supplementary file (Appendix 2). Most medicines that were  
10 recommended are not detrimental to the mother, fetus and infant. However, the respondents'  
11 recommendations on medicine use were sometimes inappropriate in terms of unneeded drug  
12 therapy, off-label use, and safety. Respondents sometimes recommended ibuprofen for headache,  
13 antibiotics for sore throat and productive cough, herbal products for cough, loratadine for runny  
14 nose and productive cough, stimulant laxatives for constipation, loperamide for diarrhea, St John's  
15 wort and melatonin for insomnia, topical products with no evidence to heal a nipple, paracetamol,  
16 moisturizing cream and domperidone for engorgement, and herbal products that contain fenugreek  
17 for insufficient milk.  
18  
19  
20  
21  
22  
23  
24  
25  
26  
27  
28  
29  
30  
31  
32  
33

34 The Cronbach's  $\alpha$  test results for the sections to determine the pharmacists' views about self-care  
35 in pregnancy and breastfeeding were as follows: four statements of support self-care, 0.84; two  
36 statements about the safety of OTC medicines, 0.91, four statements about knowledge and  
37 confidence about pregnancy and breastfeeding, 0.79, and two statements about undergraduate  
38 training in self-care for both pregnant and breastfeeding women, 0.97. Table (2) shows the  
39 respondents' views regarding self-care of pregnant and breastfeeding women. In the first dimension  
40 about self-care support, above half of respondents agreed that pharmacists are qualified to provide  
41 advice and an OTC therapy to treat symptoms in pregnant (58.9%) and breastfeeding (65.1%)  
42 women. However, less than half of participants agreed that pharmacists should recommend an OTC  
43 therapy to treat symptoms in pregnant (39.1%) and breastfeeding (46.9%) women. In the second  
44 dimension, s, more than two-fifths of participants disagreed about the safety of OTC medicines for  
45  
46  
47  
48  
49  
50  
51  
52  
53  
54  
55  
56  
57  
58  
59  
60

1 pregnant (51.6%) and breastfeeding (43.8%) women. In the third dimension about knowledge and  
2 confidence, more than half of pharmacists agreed that they are confident about providing advice and  
3 counselling to pregnant (58.3%) and breastfeeding (53.1%) women; and that they have adequate  
4 knowledge to solve medication and health problems of pregnant (61.5%) and breastfeeding (50.5%)  
5 women. In the last dimension about undergraduate training, four-in ten responders agreed that  
6 pharmacy schools provided appropriate training to provide advice and an OTC therapy for pregnant  
7 (44.3%) and breastfeeding (42.2%) women. The agreement that OTC medicines are safe was  
8 significantly higher among females compared to males ( $p=0.04$ ; OR = 2.1; 95% CI: 1.1-4.3).  
9  
10  
11  
12  
13  
14  
15  
16  
17  
18  
19  
20  
21

22 Most of the respondents ( $n=170$ ; 88.5%; 95% CI: 83.0-92.5) agreed that a continuing education  
23 program regarding this topic would be of value and priority for their practice. Attending  
24 lectures/workshops/seminars ( $n=80$ ; 47.1%) was the most convenient method of delivering  
25 continuing education for them, followed by receiving regular newsletters ( $n=61$ ; 35.9%), and  
26 receiving distant learning packages ( $n=34$ ; 20%). There was no significant association between the  
27 respondents' need for continuing education and the independent variables (age:  $p=0.44$ ; gender:  
28  $p=0.47$ ; experience:  $p=0.49$ ). The most commonly indicated sources of information used by  
29 respondents to prepare themselves for responding to symptoms in pregnancy and breastfeeding was  
30 the websites ( $n=133$ ; 69.2%), followed by books ( $n=99$ ; 51.5 %), and journal articles ( $n=19$ ; 9.9%).  
31  
32  
33  
34  
35  
36  
37  
38  
39  
40  
41  
42  
43

## 44 **DISCUSSION**

45  
46 The present results showed that community pharmacists in Kuwait are frequently consulted by  
47 pregnant and breastfeeding women. Most of the pharmacists recommended medicines or referral to  
48 a doctor rather than providing advice only for the treatment of pregnancy and breastfeeding related  
49 ailments. Recommendations on medication use were occasionally inappropriate in terms of  
50 unneeded drug therapy, off-label use, and safety. Some community pharmacists still lack confidence  
51 and knowledge to provide advice and resolve health and medication problems of pregnant and  
52  
53  
54  
55  
56  
57  
58  
59  
60

1 lactating women. To our knowledge, this is the first study to be performed in Kuwait, and the  
2  
3 second in the Middle Eastern area, and it contributes to the limited amount of existing literature in  
4  
5 the developing countries about the services provided by community pharmacists for women during  
6  
7 pregnancy and lactation. The present results present a baseline quantitative data of these services  
8  
9 that will aid in the assessment of the current pharmacy practices towards self-care during pregnancy  
10  
11 and lactation, and offer additional insight in designing future multifaceted interventions to improve  
12  
13 the community pharmacists' role to deliver the proper advice and resolve the healthcare matters of  
14  
15 pregnant and lactating women in Kuwait.  
16  
17  
18  
19  
20  
21

22 The current results reveal that the services most regularly offered to pregnant and lactating women  
23  
24 were recommending vitamin or food supplements, referral to a doctor, contraception advice, and  
25  
26 weight control advice. These results are close to those indicated in the Thai study, with the  
27  
28 exception that symptom diagnosis and medicine dispensing was a commonly provided service in  
29  
30 Thailand.<sup>16</sup> The study participants indicated that pregnant and lactating women most frequently  
31  
32 consulted them regarding gastrointestinal symptoms, respiratory symptoms, and safety of medicine  
33  
34 use. It was reported that most people considered these gastrointestinal and respiratory symptoms as  
35  
36 minor ailments that can be treated by using OTC medicines that they tend to purchase from a  
37  
38 community pharmacy.<sup>16 22</sup> The finding that respondents were also frequently consulted about the  
39  
40 safety of medicines use in pregnancy and lactation is in accordance with a previous report, which  
41  
42 has shown that women require information regarding medication use during pregnancy and  
43  
44 indicated pharmacists amongst the three mainly utilized sources of information.<sup>23</sup> These findings  
45  
46 indicate that women with pregnancy and lactation related ailments were more tending to visit a  
47  
48 pharmacist than a physician. This could be partly explained by the easy access to the community  
49  
50 pharmacies, it is evident that community pharmacies are recognized as the utmost reachable  
51  
52 healthcare settings due to the high volume of the public that utilize their services.<sup>24</sup> Furthermore, it  
53  
54  
55  
56  
57  
58  
59  
60

1 may be due to the observation of the pharmacists by the pregnant and breastfeeding women as the  
2 self-care consultant who provide them with enough time to discuss their health problems and prefer  
3 to get advice from a pharmacist rather than from a physician when they have non-serious  
4 condition.<sup>25-29</sup> These findings indicate the relevance of maternal-fetal medication as a crucial area  
5 for pharmacy practice, which needs the pharmacists to have adequate knowledge and a responsible  
6 framework in paying particular attention when these women request advice to improve maternal  
7 health.  
8  
9

10 Respondents were also asked about the services that they would recommend for pregnancy and  
11 lactation related ailments. More than half of pharmacists indicated that they would recommend  
12 medications for headache, constipation, cough, runny nose, sore throat, as well as, nausea/vomiting,  
13 indigestion, sore or cracked nipple and insufficient milk. In comparison to previous reports, a study  
14 conducted in France revealed that medications were often recommended by pharmacists for pain,  
15 fever, nose and oropharynx disorders, venous insufficiency, dyspepsia and constipation.<sup>14</sup> In  
16 Thailand, about 75% of pharmacists treated headache, runny nose and sore throat with medicines. .  
17 A recent study reported that 52% of pharmacists in Serbia recommended medication use for  
18 treatment of back pain, heavy legs, nausea, common cold and constipation during pregnancy, while  
19 62% of respondents in Norway recommended non-pharmacological advice as well as referral to a  
20 doctor.<sup>17</sup> These findings illustrate the large differences in community pharmacists practices between  
21 countries regarding the services recommended for treatment of pregnancy and lactation related  
22 ailments. This could be partly explained by the differences in regulatory environments, types of  
23 undergraduate programs, and the availability of products at the local pharmacies. The finding that  
24 less than one-tenth of the participants recommended only advice for most of the symptoms  
25 underscores the need for pharmacists to have sufficient knowledge and information about self-care  
26 practices which are crucial to alleviate some ailments without medications. The pharmacist must  
27  
28  
29  
30  
31  
32  
33  
34  
35  
36  
37  
38  
39  
40  
41  
42  
43  
44  
45  
46  
47  
48  
49  
50  
51  
52  
53  
54  
55  
56  
57  
58  
59  
60

1 have adequate information to reach a conclusion about the risk: benefit ratio of treatment for the  
2  
3 women to be able to counsel them effectively.  
4  
5  
6  
7

8 In the present study, recommendations on medication use were occasionally inappropriate in terms  
9  
10 of unneeded drug therapy, off-label use, and safety. Previous studies showed that community  
11  
12 pharmacists were incapable to offer adequate evidence-based information about use of medicines  
13  
14 during pregnancy.<sup>13 15</sup> These results demonstrate that respondents have different knowledge levels  
15  
16 in the subject of maternal-fetal medicine. and underscore the need for continuing professional  
17  
18 development and the revision of the undergraduate pharmacy curriculum to fill the knowledge gaps  
19  
20 of pharmacy students and practitioners in maternal-fetal medicine and to support pharmacists to  
21  
22 deliver the proper care for pregnant and lactating women.  
23  
24  
25  
26  
27

28 The current findings reveal that pharmacists with experience of more than 10 years recommended to  
29  
30 dispense medicines for diarrhea, constipation, and nausea/vomiting more than those with less  
31  
32 experience. This might be due to that their knowledge base in the area of pregnancy and  
33  
34 breastfeeding related ailments relies on experience gained in practice. Also, it was found that female  
35  
36 respondents recommended to dispense medications for vaginal itching/simple discharge,  
37  
38 engorgement, and insufficient milk more than males. This could be explained by the fact that female  
39  
40 pharmacists have more exposure to pregnancy-related issues, either personal or work experience for  
41  
42 pregnant or lactating women tend to discuss their concerns more comfortable with female than male  
43  
44 pharmacists. Another possible reason demonstrated by this study was their agreement that OTC  
45  
46 medicines are safe, which was significantly higher than males. Further qualitative research is  
47  
48 needed for describing and understanding these predictors.  
49  
50  
51  
52  
53  
54  
55  
56

## 57 **Conclusions**

58  
59  
60

1 The present results reveal that community pharmacists in Kuwait are frequently consulted by  
2  
3 pregnant and breastfeeding women and that the pharmacists had different approaches towards  
4  
5 responding to pregnancy and lactation related ailments. Also highlight the need for multifaceted  
6  
7 interventions, including continuing professional development and the revision of the undergraduate  
8  
9 pharmacy curriculum to fill the knowledge gaps of pharmacy students and practitioners in maternal-  
10  
11 fetal medicine and to enhance pharmacists' role in improving maternal health.  
12  
13  
14  
15  
16  
17  
18  
19  
20  
21  
22  
23  
24  
25  
26  
27  
28

### 29 **Acknowledgements**

30  
31 We appreciate the participation of the community pharmacists in this study. We gratefully  
32  
33 acknowledge the contribution of pharmacist Moodi Al-Asfour in pretesting the study questionnaire  
34  
35 and data collection.  
36  
37  
38  
39

40  
41 **Authors' contributions** AB contributed in data collection, analysis and interpretation, and wrote  
42  
43 the manuscript. AA designed and supervised the study, performed the data analysis and reviewed  
44  
45 the manuscript critically for important intellectual content. Both authors read and approved the final  
46  
47 manuscript.  
48  
49

50  
51  
52  
53 **Data sharing statement** The raw data of the present study are available from the corresponding  
54  
55 author on reasonable request.  
56  
57  
58  
59  
60

1  
2  
3  
4  
5  
6  
7  
8  
9  
10  
11  
12  
13  
14  
15  
16  
17  
18  
19  
20  
21  
22  
23  
24  
25  
26  
27  
28  
29  
30  
31  
32  
33  
34  
35  
36  
37  
38  
39  
40  
41  
42  
43  
44  
45  
46  
47  
48  
49  
50  
51  
52  
53  
54  
55  
56  
57  
58  
59  
60

For peer review only

## REFERENCES

1. World self-medication industry (WSMI). WSMI declaration on self-care and self-medication, 2006. <http://www.wsmi.org/wsmi-declaration-on-self-care-and-self-medication-2/>. (accessed 07 Feb 2017).
2. Geissler PW, Nokes K, Prince RJ, *et al*. Children and medicines: Self-treatment of common illnesses among Luo schoolchildren in western Kenya. *Soc Sci Med* 2000;50:1771-83.
3. Buitendijk S, Bracken MB. Medication in early pregnancy: Prevalence of use and relationship to maternal characteristics. *Am J Obstet Gynecol* 1991;165:33-40.
4. Aviv RI, Chubb K, Lindow SW. The prevalence of maternal medication ingestion in the antenatal period. *S Afr Med J* 1993;83:657-60.
5. Abeje G, Admasie C, Wasie B. Factors associated with self medication practice among pregnant mothers attending antenatal care at governmental health centers in Bahir Dar city administration, Northwest Ethiopia, a cross sectional study. *Pan Afr Med J* 2015;20:276.
6. Yusuff KB, Omarusehe LD. Determinants of self medication practices among pregnant women in Ibadan, Nigeria. *Int J Clin Pharm* 2011;33:868-75.
7. Kulkarni PK. IM, Chandrasekhar A Selfmedication practice among urban slum dwellers in south Indian city. *IJPBS* 2012;3:81-7.
8. Westfall RE. Herbal healing in pregnancy: women's experiences. *J Herb Pharmacother* 2003;3:17-39.
9. Chaves RG, Lamounier JA, César CC. Self-medication in nursing mothers and its influence on the duration of breastfeeding. *J Pediatr (Rio J)* 2009;85:129-34.
10. Al-Sawalha NA, Tahaine L, Sawalha A, *et al*. Medication Use in Breastfeeding Women: A National Study. *Breastfeed Med* 2016;11:386-91.
11. Lagoy CT, Joshi N, Cragan JD, *et al*. Medication use during pregnancy and lactation: an urgent call for public health action. *J Womens Health (Larchmt)* 2005;14:104-9.

- 1 12. International Pharmaceutical Federation (FIP). International Pharmaceutical Federation  
2 report on effective use of pharmacists in improving maternal, newborn and child health  
3 (MNCH), 2011. [http://www.who.int/pmnch/media/news/2012/20120223\\_fip\\_paper/en/](http://www.who.int/pmnch/media/news/2012/20120223_fip_paper/en/).  
4  
5  
6  
7 (accessed 11 Feb 2017).  
8
- 9  
10 13. Schrempp S, Ryan-Haddad A, Gait KA. Pharmacist counseling of pregnant or lactating  
11 women. *J Am Pharm Assoc (Wash)* 2001;41:887-90.  
12
- 13 14. Damase-Michel C, Vié C, Lacroix I, *et al.* Drug counselling in pregnancy: an opinion survey  
14 of French community pharmacists. *Pharmacoepidemiol Drug Saf* 2004;13:711-5.  
15
- 16 15. Lyszkiewicz DA, Gerichhausen S, Björnsdóttir I, *et al.* Evidence based information on drug  
17 use during pregnancy: a survey of community pharmacists in three countries. *Pharm World*  
18  
19  
20  
21  
22  
23  
24  
25  
26  
27 16. Sathon B. Self-care in pregnancy and breastfeeding: views of women and community  
28 pharmacists in Thailand. . Dissertation Nottingham: University of Nottingham, 2010.  
29  
30  
31  
32  
33 <http://eprints.nottingham.ac.uk/11605/>. (accessed 26 Dec 2014).  
34
- 35 17. Odalović M, Milanković S, Holst L *et al.* Pharmacists counselling of pregnant women: Web-  
36 based, comparative study between Serbia and Norway. *Midwifery* 2016;40:79-86.  
37
- 38 18. Bains S, Kitutu FE, Rahhal A *et al.* Comparison of pharmacist knowledge, perceptions and  
39 training opportunities regarding maternal/feral medicine in Canada, Qatar, and Uganda. *Can*  
40  
41  
42  
43  
44  
45  
46 19. State of kuwait: General Statistics Bureau. Statistical Review. 39 ed, 2011.  
47  
48  
49  
50  
51  
52  
53  
54  
55  
56  
57  
58  
59  
60
20. Dupont WD, Plummer WD Jr. Power and sample size calculations. version 3.1.2, 2014.  
<http://biostat.mc.vanderbilt.edu/wiki/Main/PowerSampleSize>. (accessed 12 Jan 2015).
21. World Health Organization. How to investigate drug use in health facilities: Selected drug  
use indicators. Report WHO/DAP/ 93.1, 1993.

- 1  
2  
3  
4  
5  
6  
7  
8  
9  
10  
11  
12  
13  
14  
15  
16  
17  
18  
19  
20  
21  
22  
23  
24  
25  
26  
27  
28  
29  
30  
31  
32  
33  
34  
35  
36  
37  
38  
39  
40  
41  
42  
43  
44  
45  
46  
47  
48  
49  
50  
51  
52  
53  
54  
55  
56  
57  
58  
59  
60
22. Boardman H, Lewis M, Croft P, *et al.* Trinder P, Rajaratnam G. Use of community pharmacies: a population-based survey. *J Public Health (Oxf)* 2005;27:254-62.
23. Hämeen-Anttila K1, Jyrkkä J, Enlund H *et al.* Medicines information needs during pregnancy: a multinational comparison. *BMJ Open* 2013;3(4) pii: e002594.
24. Jackson JK SBSM, Duncan GJ, Spinks, JM. Public health - recognising the role of Australian pharmacists. *J Pharm Pract Res* 2004;34:290–2.
25. Chen J, Britten. Strong medicine': an analysis of pharmacist consultations in primary care. *Fam Pract* 2000;17:480-3.
26. Bawazir SA . Consumer attitudes towards community pharmacy services in Saudi Arabia. *Int J Pharm Pract* 2004;12:83-9.
27. Wazaify M, Al-Bsoul-Younes A, Abu-Gharbieh E, *et al.* Societal perspectives on the role of community pharmacists and over-the-counter drugs in Jordan. *Pharm World Sci* 2008;30:884-91.
28. Simoens S, Lobeau M, Verbeke K, *et al.* Patient experiences of over-the-counter medicine purchases in Flemish community pharmacies. *Pharm World Sci* 2009;31:450-7.
- 29 . Wilbur K, Salam SE, Mohammadi E. Patient perceptions of pharmacist roles in guiding self-medication of over-the-counter therapy in Qatar. *Patient Prefer Adherence* 2010;4:87-93.

**Table 1 Characteristics of respondents (n=192)**

|                                                  | Frequency | Percentage (%) |
|--------------------------------------------------|-----------|----------------|
| <b>Gender</b>                                    |           |                |
| Male                                             | 127       | 66.1           |
| Female                                           | 65        | 33.9           |
| <b>Age (years)</b>                               |           |                |
| 20-29                                            | 28        | 14.6           |
| 30-39                                            | 104       | 54.2           |
| ≥ 40                                             | 60        | 31.2           |
| <b>Basic qualification in pharmacy</b>           |           |                |
| B. Pharm                                         | 177       | 92.2           |
| M. Pharm                                         | 9         | 4.7            |
| *Pharm D                                         | 6         | 3.1            |
| <b>Postgraduate qualification(s) in pharmacy</b> |           |                |
| Diploma                                          | 15        | 7.8            |
| Master degree                                    | 12        | 6.2            |
| PhD                                              | 3         | 1.6            |
| <b>Experience as practitioners (Years)</b>       |           |                |
| ≤ 10                                             | 92        | 47.9           |
| > 10                                             | 100       | 52.1           |
| <b>Location of pharmacy (Governorates)</b>       |           |                |
| Hawalli                                          | 57        | 29.7           |
| Al-Farwaniyah                                    | 43        | 22.4           |
| Al-Ahmadi/Mubarak Alkabeer                       | 43        | 22.4           |
| Capital                                          | 25        | 13.0           |
| Al-Jahra                                         | 24        | 12.5           |
| *Doctor of Pharmacy degree                       |           |                |

Table 2 Respondents views about self-care of pregnant and breastfeeding women (n=192)

|                                                                                                                                                  | Strongly disagree<br>n (%) | Disagree<br>n (%) | Neutral<br>n (%) | Agree<br>n(%) | Strongly agree<br>n (%) | Median <sup>^</sup><br>(IQR) |
|--------------------------------------------------------------------------------------------------------------------------------------------------|----------------------------|-------------------|------------------|---------------|-------------------------|------------------------------|
| <b>Support self-care</b>                                                                                                                         |                            |                   |                  |               |                         |                              |
| Community pharmacists are qualified to provide advice and an over-the-counter (OTC) therapy to treat common and minor symptoms in pregnant women | 6<br>(3.1)                 | 29<br>(15.1)      | 44<br>(22.9)     | 84<br>(43.8)  | 29<br>(15.1)            | 4.0<br>(1.0)                 |
| Community pharmacists are qualified to provide advice and an OTC therapy to treat common and minor symptoms in breastfeeding women               | 4<br>(2.1)                 | 25<br>(13.0)      | 38<br>(19.8)     | 90<br>(46.9)  | 35<br>(18.2)            | 4.0<br>(1.0)                 |
| Community pharmacists should recommend OTC therapy and counseling to treat common and minor symptoms in pregnant women                           | 14<br>(7.3)                | 49<br>(25.5)      | 54<br>(28.1)     | 55<br>(28.7)  | 20<br>(10.4)            | 3.0<br>(2.0)                 |
| Community pharmacists should recommend OTC therapy and counseling to treat common and minor symptoms in breastfeeding women                      | 13<br>(6.8)                | 40<br>(20.8)      | 49<br>(25.5)     | 72<br>(37.5)  | 18<br>(9.4)             | 3.0<br>(2.0)                 |
| <b>Overall Scale</b>                                                                                                                             |                            |                   |                  |               |                         | <b>4.0 (1.0)</b>             |
| <b>Safety of OTC medicine</b>                                                                                                                    |                            |                   |                  |               |                         |                              |
| OTC medicines are safe for pregnancy                                                                                                             | 29<br>(15.1)               | 70<br>(36.5)      | 52<br>(27.1)     | 34<br>(17.7)  | 7<br>(3.6)              | 2.0<br>(1.0)                 |
| OTC medicines are safe for breastfeeding                                                                                                         | 19<br>(9.9)                | 65<br>(33.9)      | 56<br>(29.1)     | 44<br>(22.9)  | 8<br>(4.2)              | 3.0<br>(2.0)                 |
| <b>Overall Scale</b>                                                                                                                             |                            |                   |                  |               |                         | <b>3.0 (1.0)</b>             |
| <b>Knowledge and confidence about pregnancy and breastfeeding</b>                                                                                |                            |                   |                  |               |                         |                              |
| I am confident about giving advice and counselling to pregnant women                                                                             | 8<br>(4.2)                 | 27<br>(14.1)      | 45<br>(23.4)     | 97<br>(50.5)  | 15<br>(7.8)             | 4.0<br>(1.0)                 |
| I have sufficient knowledge to solve medication and health problems of pregnant women                                                            | 7<br>(3.6)                 | 19<br>(9.9)       | 48<br>(25.0)     | 95<br>(49.5)  | 23<br>(12.0)            | 3.0<br>(2.0)                 |
| I am confident about giving advice and counselling to breastfeeding women                                                                        | 11<br>(5.8)                | 25<br>(13.0)      | 54<br>(28.1)     | 83<br>(43.2)  | 19<br>(9.9)             | 4.0<br>(1.0)                 |
| I have sufficient knowledge to solve medication and health problems of breastfeeding women                                                       | 14<br>(7.2)                | 36<br>(18.8)      | 45<br>(23.4)     | 75<br>(39.1)  | 22<br>(11.5)            | 4.0<br>(1.0)                 |
| <b>Overall Scale</b>                                                                                                                             |                            |                   |                  |               |                         | <b>4.0 (1.0)</b>             |
| <b>Undergraduate Training</b>                                                                                                                    |                            |                   |                  |               |                         |                              |
| Pharmacy school provided appropriate training regarding advice and OTC therapy for pregnant women                                                | 15<br>(7.8)                | 40<br>(20.8)      | 52<br>(27.1)     | 70<br>(36.5)  | 15<br>(7.8)             | 3.0<br>(2.0)                 |
| Pharmacy school provided appropriate training regarding advice and OTC therapy for breastfeeding women                                           | 16<br>(8.4)                | 40<br>(20.8)      | 55<br>(28.6)     | 65<br>(33.9)  | 16<br>(8.3)             | 3.0<br>(2.0)                 |
| <b>Overall Scale</b>                                                                                                                             |                            |                   |                  |               |                         | 3.0<br>(2.0)                 |

1  
2  
3  
4  
5  
6  
7  
8  
9  
10  
11  
12  
13  
14  
15  
16  
17  
18  
19  
20  
21  
22  
23  
24  
25  
26  
27  
28  
29  
30  
31  
32  
33  
34  
35  
36  
37  
38  
39  
40  
41  
42  
43  
44  
45  
46  
47  
48  
49

**Figure Legends**

Figure 1 Pharmacists' responses to eight common symptoms in pregnancy and breastfeeding (n=192)

Figure 2 Pharmacists' responses to specific symptoms in pregnancy (n=192)

Figure 3 Pharmacists' responses to specific symptoms in breastfeeding (n=192)

For peer review only



Figure 1 Pharmacists' responses to eight common symptoms in pregnancy and breastfeeding (n=192)

164x70mm (300 x 300 DPI)

Peer review only

1  
2  
3  
4  
5  
6  
7  
8  
9  
10  
11  
12  
13  
14  
15  
16  
17  
18  
19  
20  
21  
22  
23  
24  
25  
26  
27  
28  
29  
30  
31  
32  
33  
34  
35  
36  
37  
38  
39  
40  
41  
42  
43  
44  
45  
46  
47  
48  
49  
50  
51  
52  
53  
54  
55  
56  
57  
58  
59  
60



Figure 2 Pharmacists' responses to specific symptoms in pregnancy (n=192)

111x51mm (300 x 300 DPI)



Figure 3 Pharmacists' responses to specific symptoms in breastfeeding (n=192)

90x48mm (300 x 300 DPI)

review only

1  
2  
3  
4  
5  
6  
7  
8  
9  
10  
11  
12  
13  
14  
15  
16  
17  
18  
19  
20  
21  
22  
23  
24  
25  
26  
27  
28  
29  
30  
31  
32  
33  
34  
35  
36  
37  
38  
39  
40  
41  
42  
43  
44  
45  
46  
47  
48  
49  
50  
51  
52  
53  
54  
55  
56  
57  
58  
59  
60

**Part 1. Demographic and other Characteristics****PLEASE FILL IN OR TICK (✓) THE APPROPRIATE ANSWER**

1.1 Gender: [1] Male [2] Female

1.2. Age in years: .....

1.3. Basic qualification in pharmacy: [1] BSC (Pharm) or B Pharm [2] M Pharm [3] Pharm D

1.4. Do you have any postgraduate qualification(s) in pharmacy? [1] Yes [2] No

1.5. If yes to question (1.4), please tick below all that apply:

[1] Diploma [2] Master [3] Ph.D [4] Others (Please state) .....

1.6. Number of years you have practiced as pharmacist since initial licensure .....

1.7. Location of pharmacy: [1] Hawalli [2] Al-Farwaniyah [3] Al-Ahmadi/ Mubarak Al-kabeer  
[4] Al-Asima (Capital) [5] Al-Jahra

**PART 2: Services provided regarding self-care in pregnancy and lactation**

2.1 Do you have information leaflet or brochure to promote health for pregnant and breastfeeding women? [1] Yes [2] No

2.2 If yes to question (2.1), please tick the appropriate options

[1] Make it by myself [2] Drug company [3] Organization (please state).....

[4] Others (please state).....

2.3 Do you have experience in providing services for pregnant women? [1] Yes [2] No  
*(If no experience, please go to question 2.7)*

2.4. If yes to question (2.3), how many pregnant women do receive your services in this pharmacy per week? .....

2.5. If yes to question (2.3), please rank the three services that you give most frequently for pregnant women. (i.e., first, second, third)

..... Advice about a suitable behavior such as lifestyle, exercise

..... Recommend vitamin and food supplements

..... Dispensing herbal medicine

..... Dispensing medicine

..... Refer to a doctor

..... Others (Please state).....

2.6. If yes to question (2.3), please indicate two symptoms and/or questions that pregnant women most frequently consulted you about in your pharmacy in the past.

1.....

2.....

1 **2.7. Do you have experience in providing services for breastfeeding women?** [1] Yes [2] No  
 2 (If no experience, please go to PART 3)

3  
 4 **2.8. If yes to question (2.7), how many breastfeeding women do receive your services in this pharmacy per**  
 5 **week? .....**

6  
 7 **2.9. If yes to question (2.7), how do you mostly know that women who receive your services are pregnant**  
 8 **or breastfeeding? (Please tick one option)**

9  
 10 [1] Asking by Pharmacist [2] Women tell before get the services

11  
 12 [3] Others (Please state) .....

13  
 14 **2.10. If yes to question (2.7), please rank the three services that you give most frequently for breastfeeding**  
 15 **mothers. (i.e., first, second, third)**

- 16 .....Advice about a suitable behavior such as lifestyle, exercise  
 17 .....Advice about contraception such as contraceptive pill  
 18 .....Advice about weight control or lose weight  
 19 .....Dispensing herbal medicine  
 20 .....Recommend vitamin and food supplement  
 21 .....Dispensing medicine  
 22 .....Refer to doctor  
 23 .....Others (Please state).....

24  
 25 **2.11. If yes to question (2.7), please indicate two symptoms and/or questions that breastfeeding women**  
 26 **most frequently consulted you about in your pharmacy in the past.**

27  
 28 .....  
 29 .....  
 30 .....  
 31 .....  
 32 .....  
 33 .....  
 34 .....

35  
 36 **PART 3: Recommendations when counseling women on self-care in pregnancy and lactation.**

37  
 38 **3.1. If pregnant women consult you about their symptoms as listed below. Please tick one**  
 39 **recommendation (service) that would be your response for each symptom. If you choose to dispense**  
 40 **medicines or vitamin or herbal medicines, please write the name in the table.**

| Symptom                              | Refer to doctor | Provide only advice without dispensing a medicine | Dispense medicines or vitamin or herbal medicines <u>Please write the name</u> |
|--------------------------------------|-----------------|---------------------------------------------------|--------------------------------------------------------------------------------|
| 1. Nausea and vomiting               |                 |                                                   |                                                                                |
| 2. Indigestion (heartburn)           |                 |                                                   |                                                                                |
| 3. Headache                          |                 |                                                   |                                                                                |
| 4. Back pain                         |                 |                                                   |                                                                                |
| 5. Insomnia (difficulty in sleeping) |                 |                                                   |                                                                                |

|                                                                                                                                                                                                 |                                          |  |  |  |
|-------------------------------------------------------------------------------------------------------------------------------------------------------------------------------------------------|------------------------------------------|--|--|--|
| 1<br>2<br>3<br>4<br>5<br>6<br>7<br>8<br>9<br>10<br>11<br>12<br>13<br>14<br>15<br>16<br>17<br>18<br>19<br>20<br>21<br>22<br>23<br>24<br>25<br>26<br>27<br>28<br>29<br>30<br>31<br>32<br>33<br>34 | 6. Sore throat                           |  |  |  |
|                                                                                                                                                                                                 | 8. Dry cough                             |  |  |  |
|                                                                                                                                                                                                 | 9. Productive cough                      |  |  |  |
|                                                                                                                                                                                                 | 10. Fever and aches                      |  |  |  |
|                                                                                                                                                                                                 | 11. Constipation                         |  |  |  |
|                                                                                                                                                                                                 | 12. Diarrhea                             |  |  |  |
|                                                                                                                                                                                                 | 13. Hemorrhoids                          |  |  |  |
|                                                                                                                                                                                                 | 14. Vaginal itching and simple discharge |  |  |  |
|                                                                                                                                                                                                 | 15. Varicose vein                        |  |  |  |
|                                                                                                                                                                                                 | 16. Swelling feet and legs               |  |  |  |

3.2 If breastfeeding women consult you about their symptoms as listed below. Please tick one recommendation (service) that would be your response for each symptom. If you choose to dispense medicines or vitamin or herbal medicines, please write the name in the table.

| Symptom                                                                    | Refer to doctor | Provide only advice without dispensing a medicine | Dispense medicines or vitamin or herbal medicines<br><u>Please write the name</u> |
|----------------------------------------------------------------------------|-----------------|---------------------------------------------------|-----------------------------------------------------------------------------------|
| 1. Sore or cracked nipple (small ulcerations (cuts) develop on the nipple) |                 |                                                   |                                                                                   |
| 2. Engorgement (painful overfilling of the breasts with milk)              |                 |                                                   |                                                                                   |
| 3. Insufficient milk                                                       |                 |                                                   |                                                                                   |
| 4. Mastitis (inflammation of a breast)                                     |                 |                                                   |                                                                                   |
| 5. Diarrhea                                                                |                 |                                                   |                                                                                   |

|                      |  |  |  |
|----------------------|--|--|--|
| 6. Constipation      |  |  |  |
| 7. Hemorrhoids       |  |  |  |
| 8. Headache          |  |  |  |
| 9. Sore throat       |  |  |  |
| 10. Runny nose       |  |  |  |
| 11. Dry cough        |  |  |  |
| 12. Productive cough |  |  |  |

**PART 4: Views about self-care in pregnancy and lactation**

**Please tick one option that best describes your own view**

|                                                                                                                                                      | 1. Strongly disagree | 2. Disagree | 3. Neither disagree or agree | 4. Agree | 5. Strongly agree |
|------------------------------------------------------------------------------------------------------------------------------------------------------|----------------------|-------------|------------------------------|----------|-------------------|
| 4.1 Community pharmacists are qualified to provide advice and an over-the-counter (OTC) therapy to treat common and minor symptoms in pregnant women |                      |             |                              |          |                   |
| 4.2 Community pharmacists are qualified to provide advice and an OTC therapy to treat common and minor symptoms in breastfeeding women               |                      |             |                              |          |                   |
| 4.3 Community pharmacists should recommend OTC therapy and counseling to treat common and minor symptoms in pregnant women                           |                      |             |                              |          |                   |
| 4.4 Community pharmacists should recommend OTC therapy and counseling to treat common and minor symptoms in breastfeeding women                      |                      |             |                              |          |                   |
| 4.5 OTC medicines are safe for pregnancy.                                                                                                            |                      |             |                              |          |                   |
| 4.6 OTC medicines are safe for breastfeeding.                                                                                                        |                      |             |                              |          |                   |
| 4.7 I am confident about giving advice and counselling to pregnant women                                                                             |                      |             |                              |          |                   |
| 4.8 I have sufficient knowledge to solve medication and health problems of pregnant women                                                            |                      |             |                              |          |                   |
| 4.9 I am confident about giving advice and counselling to breastfeeding women                                                                        |                      |             |                              |          |                   |

|                                                                                                                                                                                                                      |                                                                                                              |  |  |  |  |  |
|----------------------------------------------------------------------------------------------------------------------------------------------------------------------------------------------------------------------|--------------------------------------------------------------------------------------------------------------|--|--|--|--|--|
| 1<br>2<br>3<br>4<br>5<br>6<br>7<br>8<br>9                                                                                                                                                                            | 4.10 I have sufficient knowledge to solve medication and health problems of breastfeeding women              |  |  |  |  |  |
| 10<br>11<br>12<br>13<br>14<br>15<br>16<br>17<br>18<br>19<br>20<br>21<br>22<br>23<br>24                                                                                                                               | 4.11 Pharmacy school provided appropriate training regarding advice and OTC therapy for pregnant women.      |  |  |  |  |  |
| 25<br>26<br>27<br>28<br>29<br>30<br>31<br>32<br>33<br>34<br>35<br>36<br>37<br>38<br>39<br>40<br>41<br>42<br>43<br>44<br>45<br>46<br>47<br>48<br>49<br>50<br>51<br>52<br>53<br>54<br>55<br>56<br>57<br>58<br>59<br>60 | 4.12 Pharmacy school provided appropriate training regarding advice and OTC therapy for breastfeeding women. |  |  |  |  |  |

4.14 Do a continuing education program regarding this topic would be of value/priority for your practice?

[1] Strongly disagree [2] disagree [3] Neutral [4] Agree [5] strongly agree

4.15 If you agree or strongly agree to participate in continuing education program, what would be the most convenient method of delivering continuing education to you? *(Please tick one option)*

[1] Attending lectures and workshops/seminars [2] Receiving regular news letters  
 [3] Receiving distant learning packages [4] Others (Please state) .....

4.16 What is /are the most common source(s) of information do you use for responding to symptoms during pregnancy and breastfeeding and /or searching about medicines use in pregnancy and breastfeeding? *(You may tick more than one option)*

[1] Books [2] Journal articles [3] Handout [4] Website [5] Others (please state).....

**Thank you for your time and cooperation in completing this questionnaire.**

## Names of medications recommended by pharmacists for eight common symptoms in pregnancy and breastfeeding

| Common symptoms                           | Frequency (%) of pharmacists recommended medicines for pregnant women | Frequency (%) of pharmacists recommended medicines for breastfeeding women |
|-------------------------------------------|-----------------------------------------------------------------------|----------------------------------------------------------------------------|
| <b>4 Headache</b>                         | *n=154                                                                | *n=169                                                                     |
| 5 Paracetamol tablet                      | 151 (98.1%)                                                           | 145 (85.8)                                                                 |
| 6 Ibuprofen tablet                        | 3 (1.9%)                                                              | 24 (14.2)                                                                  |
| <b>7 Sore throat**</b>                    | *n= 106                                                               | *n=124                                                                     |
| 8 Lozenges                                | 90 (84.9)                                                             | 89 (71.8)                                                                  |
| 9 Paracetamol tablet                      | 16 (15.1)                                                             | 29 (23.4)                                                                  |
| 10 Vitamin C tablet                       | 14 (13.2)                                                             | 16 (12.9)                                                                  |
| 11 Amoxicillin capsule                    | 4 (3.8)                                                               | 6 (4.8)                                                                    |
| 12 Azithromycin tablet                    | 2 (1.9)                                                               | 2 (1.6)                                                                    |
| <b>13 Runny nose**</b>                    | *n=113                                                                | *n=124                                                                     |
| 14 Normal saline spray                    | 69 (61.1)                                                             | 33 (26.6)                                                                  |
| 15 Loratadine tablet                      | 17 (15.0)                                                             | 30 (24.2)                                                                  |
| 16 Paracetamol and Pseudoephedrine tablet | 19 (16.8)                                                             | 22 (17.7)                                                                  |
| 17 Vitamin C tablet                       | 21 (18.6)                                                             | 25 (20.2)                                                                  |
| 18 Cetrizine tablet                       | 7 (6.2)                                                               | 17 (13.7)                                                                  |
| 19 Corticosteroid nasal spray             | 2 (1.8)                                                               | 3 (1.6)                                                                    |
| <b>21 Dry cough</b>                       | *n=110                                                                | *n=126                                                                     |
| 22 Prospan® syrup                         | 86 (78.2)                                                             | 75 (59.5)                                                                  |
| 23 Codilar® syrup                         | 12 (10.9)                                                             | 20 (15.9)                                                                  |
| 24 Cloperastine syrup                     | 8 (7.3)                                                               | 22 (17.5)                                                                  |
| 25 Butamirate syrup                       | 4 (3.6)                                                               | 9 (7.1)                                                                    |
| <b>27 Productive cough**</b>              | *n=129                                                                | *n=131                                                                     |
| 28 Prospan® syrup                         | 113 (87.6)                                                            | 85 (64.9)                                                                  |
| 29 Mucolytic syrup                        | 15 (11.6)                                                             | 9 (6.9)                                                                    |
| 30 Amoxicillin capsule                    | 2 (1.6)                                                               | 2 (1.5)                                                                    |
| 31 Loratadine tablet                      | 3 (2.3)                                                               | 24 (18.3)                                                                  |
| 32 Butamirate syrup                       | -                                                                     | 10 (7.6)                                                                   |
| 33 Cloperastine syrup                     | -                                                                     | 8 (6.1)                                                                    |
| <b>34 Constipation</b>                    | *n=138                                                                | *n=134                                                                     |
| 35 Sterculia granules                     | 63 (45.7)                                                             | 43 (32.1)                                                                  |
| 36 Lactulose syrup                        | 60 (43.5)                                                             | 63 (47.0)                                                                  |
| 37 Glycerine suppository                  | 6 (4.3)                                                               | 11 (8.2)                                                                   |
| 38 Sennalax® tablet®                      | 9 (6.5)                                                               | 17 (12.7)                                                                  |
| <b>39 Diarrhea**</b>                      | n=75                                                                  | n=90                                                                       |
| 40 Kaolin + Pectin syrup                  | 23 (30.7)                                                             | 18 (20.0)                                                                  |
| 41 Nifuroxazide tablet                    | 18 (24.0)                                                             | 32 (35.6)                                                                  |
| 42 Loperamide tablet                      | 16 (21.3)                                                             | 26 (28.9)                                                                  |
| 43 Oral rehydration salts                 | 25 (33.3)                                                             | 21 (23.3)                                                                  |
| 44 Activated charcoal tablet              | 3 (4.0)                                                               | -                                                                          |
| 45 Hyoscine tablet                        | -                                                                     | 3 (3.3)                                                                    |
| <b>46 Hemorrhoids</b>                     | n=84                                                                  | n=95                                                                       |
| 47 Neo-healar® cream                      | 35 (41.6)                                                             | 25 (26.3)                                                                  |
| 48 Pilex® ointment®                       | 24 (28.6)                                                             | 17 (17.9)                                                                  |
| 49 Procto-Glyvenol® cream                 | 15 (17.9)                                                             | 24 (25.3)                                                                  |
| 50 Procto-Glyvenol® suppository           | 10 (11.9)                                                             | 15 (15.8)                                                                  |
| 51 Daflon® tablet                         | -                                                                     | 2 (2.1)                                                                    |
| 52 Proctosedyl® suppository               | -                                                                     | 12 (12.6)                                                                  |

53 \*Number of pharmacists recommended dispensation of a medicine; \*\* May total > 100% because of recommended combination of medicines; Prospan® (herbal medicinal product containing ivy leaf extract); Codilar® (Chlorpheniramine + Dextromethorphan + Phenylephrine); Sennalax® (Sennosides + docusate); Neo-healar® (four medicinal plants: Lupinus Albus, Vateria Indica, Mentha Piperita, Aloe Vera); Pilex® (a mixture of herbs [Mimosa pudica, thistles, Vitex negundo, Calendula flowers, camphor], Zinc, and Borax); Procto-Glyvenol® (tribenosid + lidocaine); Daflon® (diosmin + hesperidin); Proctosedyl® (hydrocortisone + cinchocaine).

| <b>Names of medications recommended by respondents for specific symptoms in pregnancy</b> |                                                           |
|-------------------------------------------------------------------------------------------|-----------------------------------------------------------|
| <b>Specific pregnancy symptoms</b>                                                        | <b>Frequency (%) of pharmacists recommended medicines</b> |
| <b>Nausea and vomiting</b>                                                                | *n=139                                                    |
| Navidoxine® tablet                                                                        | 110 (79.1)                                                |
| Ondasetron tablet                                                                         | 27 (19.4)                                                 |
| Domperidone tablet                                                                        | 1 (0.7)                                                   |
| Multivitamin capsule                                                                      | 1 (0.7)                                                   |
| <b>Indigestion (heartburn)</b>                                                            | *n=131                                                    |
| Gaviscon® suspension                                                                      | 89 (67.9)                                                 |
| Ranitidine tablet                                                                         | 20 (15.3)                                                 |
| Zymogen® tablet                                                                           | 22 (16.8)                                                 |
| <b>Back pain**</b>                                                                        | *n=92                                                     |
| Paracetamol tablet                                                                        | 42 (45.7)                                                 |
| Diclofenac gel                                                                            | 27 (29.3)                                                 |
| Reparil® gel                                                                              | 7 (7.6)                                                   |
| Relaxnova® cream                                                                          | 21 (22.8)                                                 |
| <b>Insomnia</b>                                                                           | *n=20                                                     |
| St John's wort®                                                                           | 5 (25.0)                                                  |
| Dream water®                                                                              | 10 (50.0)                                                 |
| Melatonin tablet                                                                          | 5 (25.0)                                                  |
| <b>Fever and aches</b>                                                                    | *n=93                                                     |
| Paracetamol tablet                                                                        | 93 (100)                                                  |
| <b>Vaginal itching and simple discharge</b>                                               | *n=67                                                     |
| Clotrimazole ovule                                                                        | 20 (29.9)                                                 |
| Clotrimazole cream                                                                        | 15 (22.4)                                                 |
| Clotrimazole wash                                                                         | 9 (13.4)                                                  |
| Miconazole cream                                                                          | 11 (16.4)                                                 |
| Miconazole ovule                                                                          | 12 (17.9)                                                 |
| <b>Varicose veins</b>                                                                     | *n=28                                                     |
| Venoruton® gel                                                                            | 21 (75.0)                                                 |
| Reparil® gel                                                                              | 7 (25.0)                                                  |
| <b>Swelling feet and legs</b>                                                             | *n=15                                                     |
| Reparil® gel                                                                              | 11 (73.3)                                                 |
| Varixinal® gel                                                                            | 4 (26.7)                                                  |

\*Number of pharmacists recommended dispensation of a medicine; \*\* May total > 100% because of recommended combination of medicines; Zymogen® (Lipase + Proteas + Pepsin + Hemicellulase + Ox bile extract + Dimethylpolysiloxane + Vitamin B1); Reparil® (Aescinum + Diethylamini salicylas); Relaxnova® (Idrocilamide) ; St John's Wort® (Hypericum perforatum); Dream water® (Melatonin + 5-HTP + GABA); Venorutin® (Rutoside); Varixinal® (Ruscus Aculeatus Extract, Aesculus Hippocastanum Extract, Centella Asiatica Extract, Vaccinium Myrtillus Extract).

| <b>Names of medications recommended by respondents for specific symptoms in breastfeeding</b>                                                                                                                                                                                                                       |                                                           |
|---------------------------------------------------------------------------------------------------------------------------------------------------------------------------------------------------------------------------------------------------------------------------------------------------------------------|-----------------------------------------------------------|
| <b>Common breastfeeding symptoms</b>                                                                                                                                                                                                                                                                                | <b>Frequency (%) of pharmacists recommended medicines</b> |
| <b>Sore or cracked nipple</b>                                                                                                                                                                                                                                                                                       | *n=167                                                    |
| Panthenol cream                                                                                                                                                                                                                                                                                                     | 53 (31.7)                                                 |
| Lanolin cream                                                                                                                                                                                                                                                                                                       | 45 (26.9)                                                 |
| Avalon Organics® moisturizer                                                                                                                                                                                                                                                                                        | 35 (21.0)                                                 |
| Mustela® Nipple Cream                                                                                                                                                                                                                                                                                               | 18 (10.8)                                                 |
| Mebo® ointment                                                                                                                                                                                                                                                                                                      | 12 (7.2)                                                  |
| Cocoa butter cream                                                                                                                                                                                                                                                                                                  | 4 (2.4)                                                   |
| <b>Engorgement</b>                                                                                                                                                                                                                                                                                                  | *n=17                                                     |
| Moisturizing cream                                                                                                                                                                                                                                                                                                  | 6 (35.3)                                                  |
| Cabergolin tablet                                                                                                                                                                                                                                                                                                   | 5 (29.4)                                                  |
| Paracetamol tablet                                                                                                                                                                                                                                                                                                  | 4 (23.5)                                                  |
| Fucidin cream                                                                                                                                                                                                                                                                                                       | 2 ( 11.8)                                                 |
| <b>Insufficient milk</b>                                                                                                                                                                                                                                                                                            | *n=138                                                    |
| Fitolat® tablet                                                                                                                                                                                                                                                                                                     | 118 (85.5)                                                |
| Domperidone tablet                                                                                                                                                                                                                                                                                                  | 10 (7.2)                                                  |
| Multivitamins Capsule                                                                                                                                                                                                                                                                                               | 10 (7.2)                                                  |
| <b>Mastitis</b>                                                                                                                                                                                                                                                                                                     | *n=17                                                     |
| Local antibiotic cream                                                                                                                                                                                                                                                                                              | 3 (17.6)                                                  |
| Panthenol cream                                                                                                                                                                                                                                                                                                     | 6 (35.3)                                                  |
| Amoxicillin capsule                                                                                                                                                                                                                                                                                                 | 3 (17.6)                                                  |
| Paracetamol tablet                                                                                                                                                                                                                                                                                                  | 2 (11.8)                                                  |
| Diclofenac tablet                                                                                                                                                                                                                                                                                                   | 2 (11.8)                                                  |
| Fitolat® tablet                                                                                                                                                                                                                                                                                                     | 1 (5.9)                                                   |
| *Number of pharmacists recommended dispensation of a medicine; Avalon® (Lavender + prebiotics); Mebo® (Sesame oil + Beeswax + other edible herbs); Mustela® (Avocado peptides + Bisabolol + Shea butter + Lupeol + Vitamin B5); Fitolat® (herbal extracts from plants, such as Fennel, Fenugreek, Hops and Verbena) |                                                           |
