# Supplementary material for: Community pharmacists’ services for women during pregnancy and breast feeding in Kuwait: a cross-sectional study
Source: PubMed Central journal article supplement — BMJ Open. 2018 Jan 5;8(1):e018980. doi: 10.1136/bmjopen-2017-018980 (PMC5780848; doi:10.1136/bmjopen-2017-018980), 2018-01-05
Supplement: bmjopen-2017-018980supp002.pdf [file bmjopen-2017-018980supp002.pdf]

**Names of medications recommended by pharmacists for eight common symptoms in pregnancy and breastfeeding**

| <b>Common symptoms</b>                 | <b>Frequency (%) of pharmacists recommended medicines for pregnant women</b> | <b>Frequency (%) of pharmacists recommended medicines for breastfeeding women</b> |
|----------------------------------------|------------------------------------------------------------------------------|-----------------------------------------------------------------------------------|
| <b>Headache</b>                        | *n=154                                                                       | *n=169                                                                            |
| Paracetamol tablet                     | 151 (98.1%)                                                                  | 145 (85.8)                                                                        |
| Ibuprofen tablet                       | 3 (1.9%)                                                                     | 24 (14.2)                                                                         |
| <b>Sore throat**</b>                   | *n= 106                                                                      | *n=124                                                                            |
| Lozenges                               | 90 (84.9)                                                                    | 89 (71.8)                                                                         |
| Paracetamol tablet                     | 16 (15.1)                                                                    | 29 (23.4)                                                                         |
| Vitamin C tablet                       | 14 (13.2)                                                                    | 16 (12.9)                                                                         |
| Amoxicillin capsule                    | 4 (3.8)                                                                      | 6 (4.8)                                                                           |
| Azithromycin tablet                    | 2 (1.9)                                                                      | 2 (1.6)                                                                           |
| <b>Runny nose**</b>                    | *n=113                                                                       | *n=124                                                                            |
| Normal saline spray                    | 69 (61.1)                                                                    | 33 (26.6)                                                                         |
| Loratadine tablet                      | 17 (15.0)                                                                    | 30 (24.2)                                                                         |
| Paracetamol and Pseudoephedrine tablet | 19 (16.8)                                                                    | 22 (17.7)                                                                         |
| Vitamin C tablet                       | 21 (18.6)                                                                    | 25 (20.2)                                                                         |
| Vitamin C tablet                       | 7 (6.2)                                                                      | 17 (13.7)                                                                         |
| Cetirizine tablet                      | 2 (1.8)                                                                      | 3 (1.6)                                                                           |
| Corticosteroid nasal spray             |                                                                              |                                                                                   |
| <b>Dry cough</b>                       | *n=110                                                                       | *n=126                                                                            |
| Prospan® syrup                         | 86 (78.2)                                                                    | 75 (59.5)                                                                         |
| Codilar® syrup                         | 12 (10.9)                                                                    | 20 (15.9)                                                                         |
| Cloperastine syrup                     | 8 (7.3)                                                                      | 22 (17.5)                                                                         |
| Butamirate syrup                       | 4 (3.6)                                                                      | 9 (7.1)                                                                           |
| <b>Productive cough**</b>              | *n=129                                                                       | *n=131                                                                            |
| Prospan® syrup                         | 113 (87.6)                                                                   | 85 (64.9)                                                                         |
| Mucolytic syrup                        | 15 (11.6)                                                                    | 9 (6.9)                                                                           |
| Amoxicillin capsule                    | 2 (1.6)                                                                      | 2 (1.5)                                                                           |
| Loratadine tablet                      | 3 (2.3)                                                                      | 24 (18.3)                                                                         |
| Butamirate syrup                       | -                                                                            | 10 (7.6)                                                                          |
| Cloperastine syrup                     | -                                                                            | 8 (6.1)                                                                           |
| <b>Constipation</b>                    | *n=138                                                                       | *n=134                                                                            |
| Sterculia granules                     | 63 (45.7)                                                                    | 43 (32.1)                                                                         |
| Lactulose syrup                        | 60 (43.5)                                                                    | 63 (47.0)                                                                         |
| Glycerine suppository                  | 6 (4.3)                                                                      | 11 (8.2)                                                                          |
| Sennalax® tablet®                      | 9 (6.5)                                                                      | 17 (12.7)                                                                         |
| <b>Diarrhea**</b>                      | n=75                                                                         | n=90                                                                              |
| Kaolin + Pectin syrup                  | 23 (30.7)                                                                    | 18 (20.0)                                                                         |
| Nifuroxazide tablet                    | 18 (24.0)                                                                    | 32 (35.6)                                                                         |
| Loperamide tablet                      | 16 (21.3)                                                                    | 26 (28.9)                                                                         |
| Oral rehydration salts                 | 25 (33.3)                                                                    | 21 (23.3)                                                                         |
| Activated charcoal tablet              | 3 (4.0)                                                                      | -                                                                                 |
| Hyoscine tablet                        | -                                                                            | 3 (3.3)                                                                           |
| <b>Hemorrhoids</b>                     | n=84                                                                         | n=95                                                                              |
| Neo-healar® cream                      | 35 (41.6)                                                                    | 25 (26.3)                                                                         |
| Pilex® ointment®                       | 24 (28.6)                                                                    | 17 (17.9)                                                                         |
| Procto-Glyvenol® cream                 | 15 (17.9)                                                                    | 24 (25.3)                                                                         |
| Procto-Glyvenol® suppository           | 10 (11.9)                                                                    | 15 (15.8)                                                                         |
| Daflon® tablet                         | -                                                                            | 2 (2.1)                                                                           |
| Proctosedyl® suppository               | -                                                                            | 12 (12.6)                                                                         |

\*Number of pharmacists recommended dispensation of a medicine; \*\* May total > 100% because of recommended combination of medicines; Prospan® (herbal medicinal product containing ivy leaf extract); Codilar® (Chlorpheniramine + Dextromethorphan + Phenylephrine); Sennalax® (Sennosides + docusate); Neo-healar® (four medicinal plants: Lupinus Albus, Vateria Indica, Mentha Piperita, Aloe Vera); Pilex® (a mixture of herbs [Mimosa pudica, thistles, Vitex negundo, Calendula flowers, camphor], Zinc, and Borax); Procto-Glyvenol® (tribenosid + lidocaine); Daflon® (diosmin + hesperidin); Proctosedyl® (hydrocortisone + cinchocaine).

| <b>Names of medications recommended by respondents for specific symptoms in pregnancy</b> |                                                           |
|-------------------------------------------------------------------------------------------|-----------------------------------------------------------|
| <b>Specific pregnancy symptoms</b>                                                        | <b>Frequency (%) of pharmacists recommended medicines</b> |
| <b>Nausea and vomiting</b>                                                                | *n=139                                                    |
| Navidoxine® tablet                                                                        | 110 (79.1)                                                |
| Ondasetron tablet                                                                         | 27 (19.4)                                                 |
| Domperidone tablet                                                                        | 1 (0.7)                                                   |
| Multivitamin capsule                                                                      | 1 (0.7)                                                   |
| <b>Indigestion (heartburn)</b>                                                            | *n=131                                                    |
| Gaviscon® suspension                                                                      | 89 (67.9)                                                 |
| Ranitidine tablet                                                                         | 20 (15.3)                                                 |
| Zymogen® tablet                                                                           | 22 (16.8)                                                 |
| <b>Back pain**</b>                                                                        | *n=92                                                     |
| Paracetamol tablet                                                                        | 42 (45.7)                                                 |
| Diclofenac gel                                                                            | 27 (29.3)                                                 |
| Reparil® gel                                                                              | 7 (7.6)                                                   |
| Relaxnova® cream                                                                          | 21 (22.8)                                                 |
| <b>Insomnia</b>                                                                           | *n=20                                                     |
| St John's wort®                                                                           | 5 (25.0)                                                  |
| Dream water®                                                                              | 10 (50.0)                                                 |
| Melatonin tablet                                                                          | 5 (25.0)                                                  |
| <b>Fever and aches</b>                                                                    | *n=93                                                     |
| Paracetamol tablet                                                                        | 93 (100)                                                  |
| <b>Vaginal itching and simple discharge</b>                                               | *n=67                                                     |
| Clotrimazole ovule                                                                        | 20 (29.9)                                                 |
| Clotrimazole cream                                                                        | 15 (22.4)                                                 |
| Clotrimazole wash                                                                         | 9 (13.4)                                                  |
| Miconazole cream                                                                          | 11 (16.4)                                                 |
| Miconazole ovule                                                                          | 12 (17.9)                                                 |
| <b>Varicose veins</b>                                                                     | *n=28                                                     |
| Venoruton® gel                                                                            | 21 (75.0)                                                 |
| Reparil® gel                                                                              | 7 (25.0)                                                  |
| <b>Swelling feet and legs</b>                                                             | *n=15                                                     |
| Reparil® gel                                                                              | 11 (73.3)                                                 |
| Varixinal® gel                                                                            | 4 (26.7)                                                  |

\*Number of pharmacists recommended dispensation of a medicine; \*\* May total > 100% because of recommended combination of medicines; Zymogen® (Lipase + Proteas +Pepsin + Hemicellulase +Ox bile extract +Dimethylpolysiloxane +Vitamin B1); Reparil® (Aescinum +Diethylamini salicylas); Relaxnova® (Idrocilamide) ; St John's Wort® (Hypericum perforatum); Dream water® (Melatonin + 5-HTP + GABA); Venorutin® (Rutoside); Varixinal® (Ruscus Aculeatus Extract, Aesculus Hippocastanum Extract, Centella Asiatica Extract, Vaccinium Myrtillus Extract).

| <b>Names of medications recommended by respondents for specific symptoms in breastfeeding</b>                                                                                                                                                                                                                       |                                                           |
|---------------------------------------------------------------------------------------------------------------------------------------------------------------------------------------------------------------------------------------------------------------------------------------------------------------------|-----------------------------------------------------------|
| <b>Common breastfeeding symptoms</b>                                                                                                                                                                                                                                                                                | <b>Frequency (%) of pharmacists recommended medicines</b> |
| <b>Sore or cracked nipple</b>                                                                                                                                                                                                                                                                                       | *n=167                                                    |
| Panthenol cream                                                                                                                                                                                                                                                                                                     | 53 (31.7)                                                 |
| Lanolin cream                                                                                                                                                                                                                                                                                                       | 45 (26.9)                                                 |
| Avalon Organics® moisturizer                                                                                                                                                                                                                                                                                        | 35 (21.0)                                                 |
| Mustela® Nipple Cream                                                                                                                                                                                                                                                                                               | 18 (10.8)                                                 |
| Mebo® ointment                                                                                                                                                                                                                                                                                                      | 12 (7.2)                                                  |
| Cocoa butter cream                                                                                                                                                                                                                                                                                                  | 4 (2.4)                                                   |
| <b>Engorgement</b>                                                                                                                                                                                                                                                                                                  | *n=17                                                     |
| Moisturizing cream                                                                                                                                                                                                                                                                                                  | 6 (35.3)                                                  |
| Cabergolin tablet                                                                                                                                                                                                                                                                                                   | 5 (29.4)                                                  |
| Paracetamol tablet                                                                                                                                                                                                                                                                                                  | 4 (23.5)                                                  |
| Fucidin cream                                                                                                                                                                                                                                                                                                       | 2 ( 11.8)                                                 |
| <b>Insufficient milk</b>                                                                                                                                                                                                                                                                                            | *n=138                                                    |
| Fitolat® tablet                                                                                                                                                                                                                                                                                                     | 118 (85.5)                                                |
| Domperidone tablet                                                                                                                                                                                                                                                                                                  | 10 (7.2)                                                  |
| Multivitamins Capsule                                                                                                                                                                                                                                                                                               | 10 (7.2)                                                  |
| <b>Mastitis</b>                                                                                                                                                                                                                                                                                                     | *n=17                                                     |
| Local antibiotic cream                                                                                                                                                                                                                                                                                              | 3 (17.6)                                                  |
| Panthenol cream                                                                                                                                                                                                                                                                                                     | 6 (35.3)                                                  |
| Amoxicillin capsule                                                                                                                                                                                                                                                                                                 | 3 (17.6)                                                  |
| Paracetamol tablet                                                                                                                                                                                                                                                                                                  | 2 (11.8)                                                  |
| Diclofenac tablet                                                                                                                                                                                                                                                                                                   | 2 (11.8)                                                  |
| Fitolat® tablet                                                                                                                                                                                                                                                                                                     | 1 (5.9)                                                   |
| *Number of pharmacists recommended dispensation of a medicine; Avalon® (Lavender + prebiotics); Mebo® (Sesame oil + Beeswax + other edible herbs); Mustela® (Avocado peptides + Bisabolol + Shea butter + Lupeol + Vitamin B5); Fitolat® (herbal extracts from plants, such as Fennel, Fenugreek, Hops and Verbena) |                                                           |
